# Supplementary material
Source: PubMed Central journal article supplement (PMC3657516)
Supplement: NIHMS456935-supplement-Supplemental_Figures.pdf [file NIHMS456935-supplement-Supplemental_Figures.pdf]

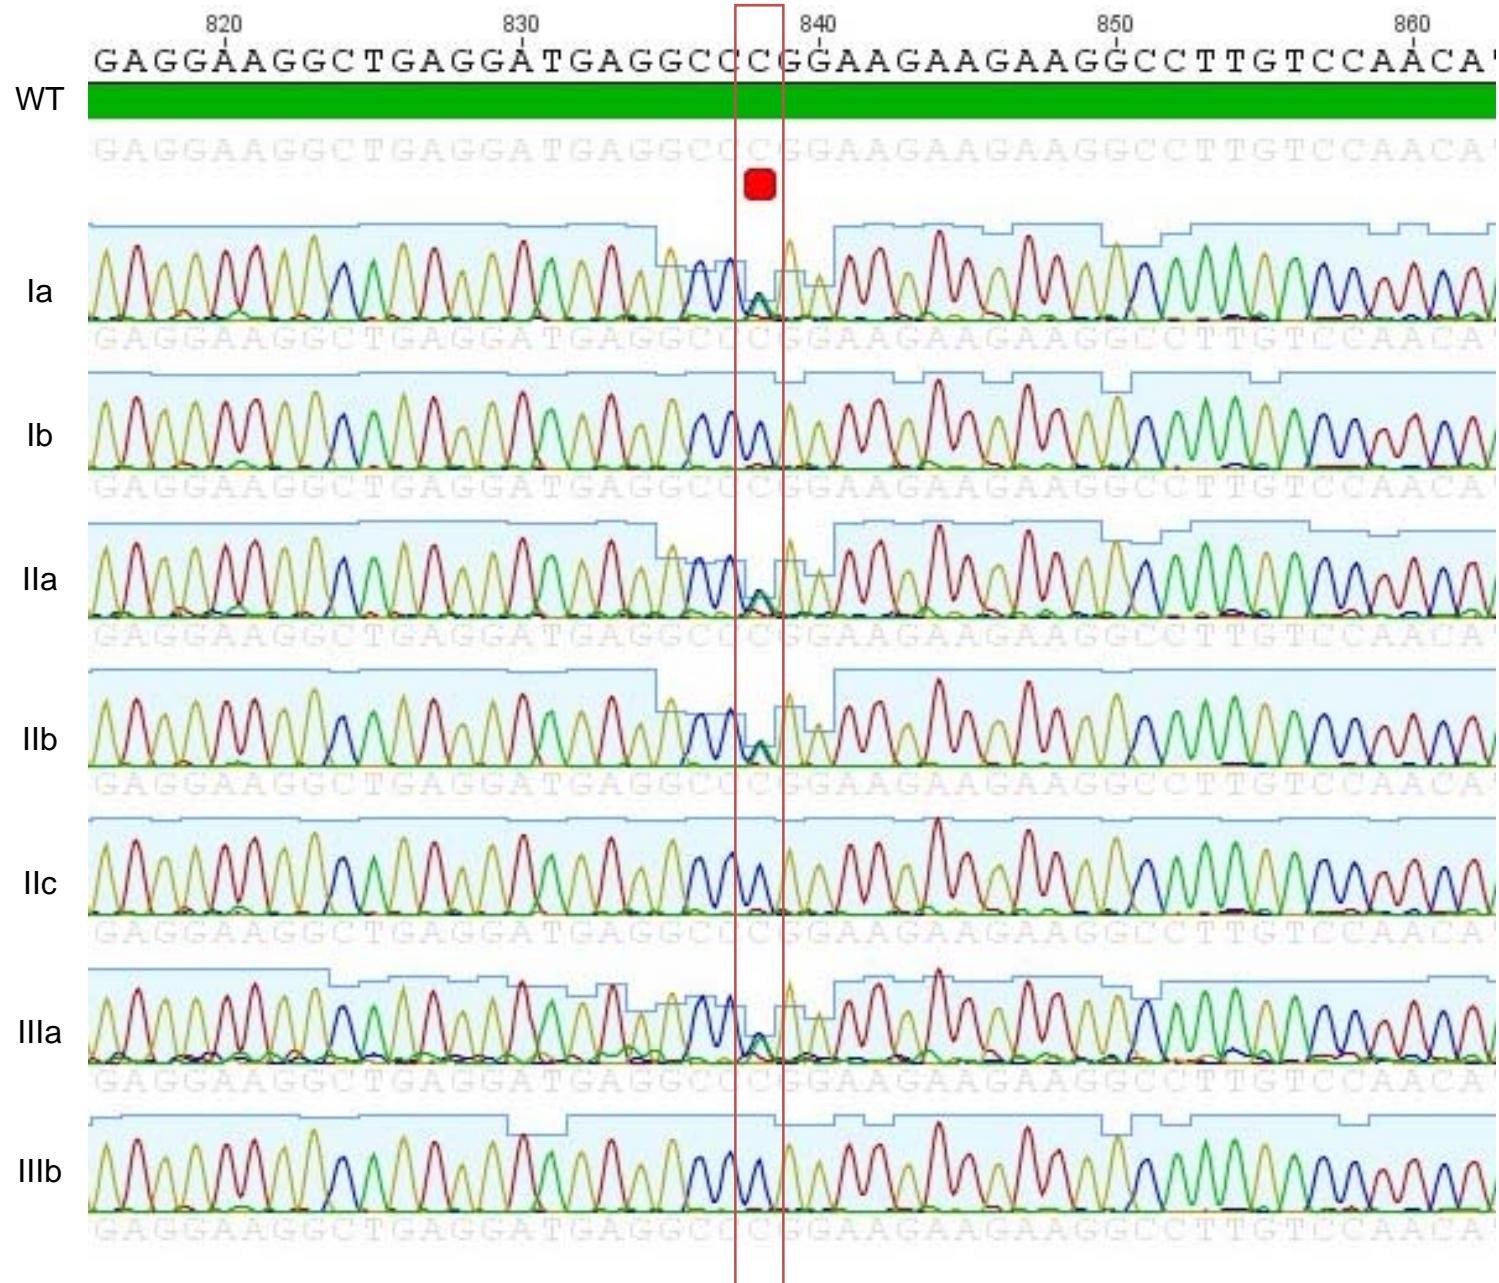

Fig. S1

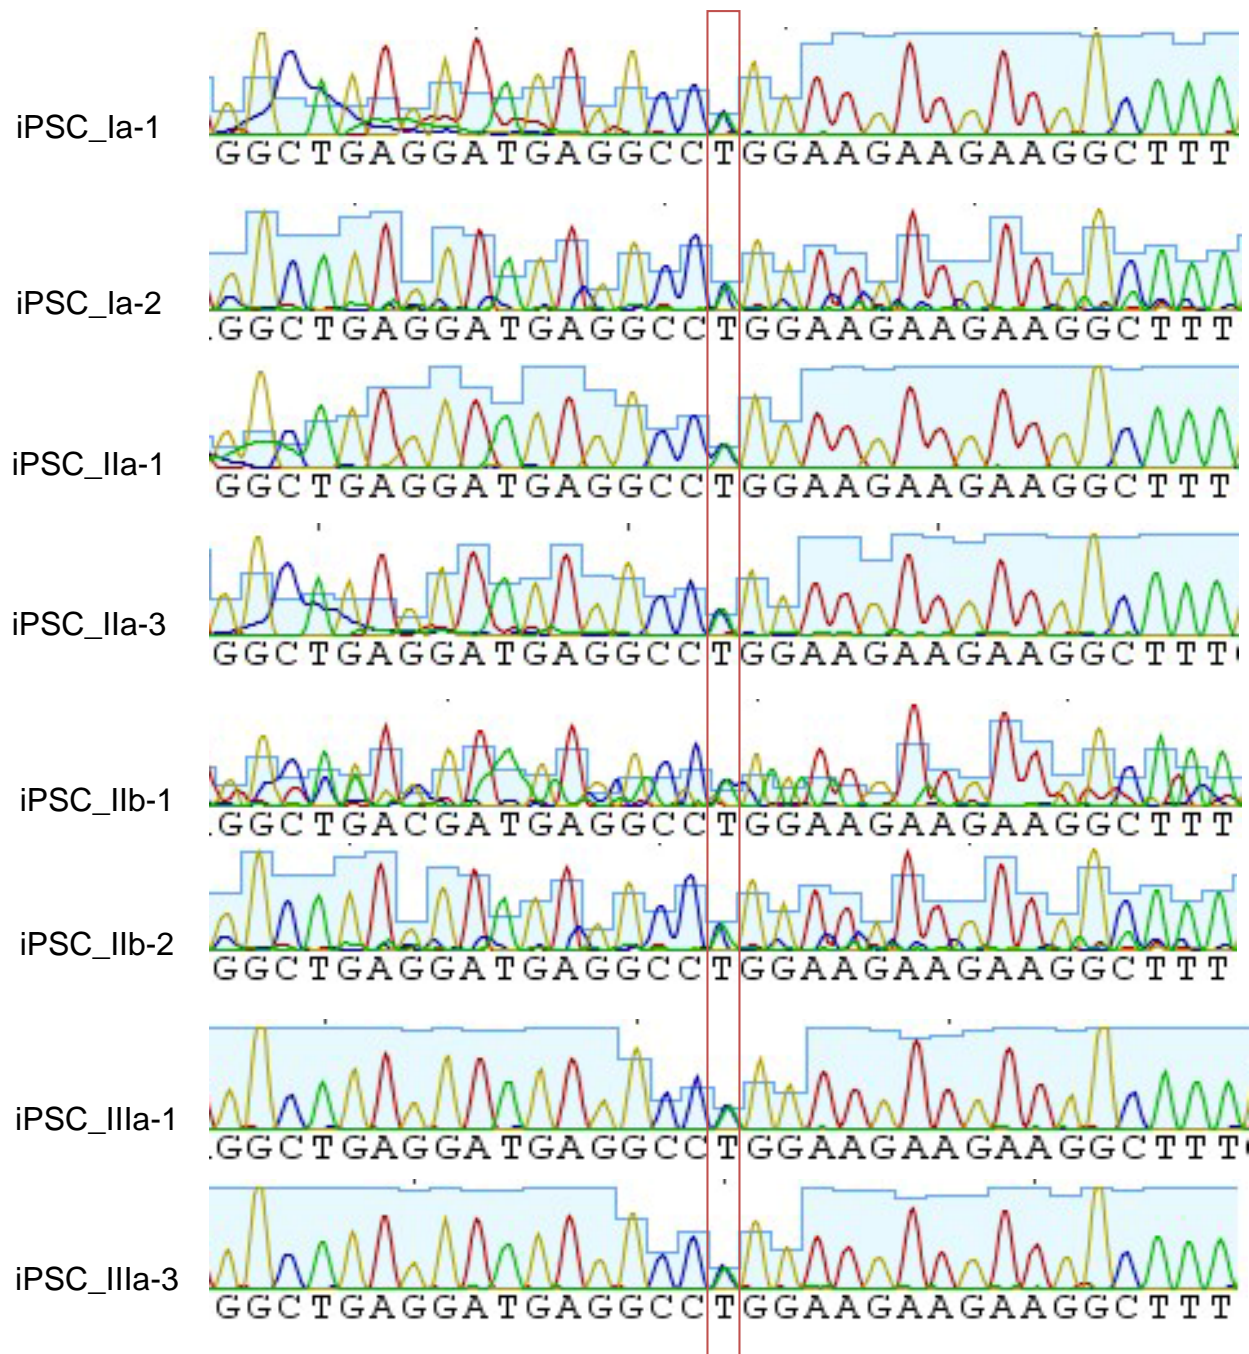

Fig. S2

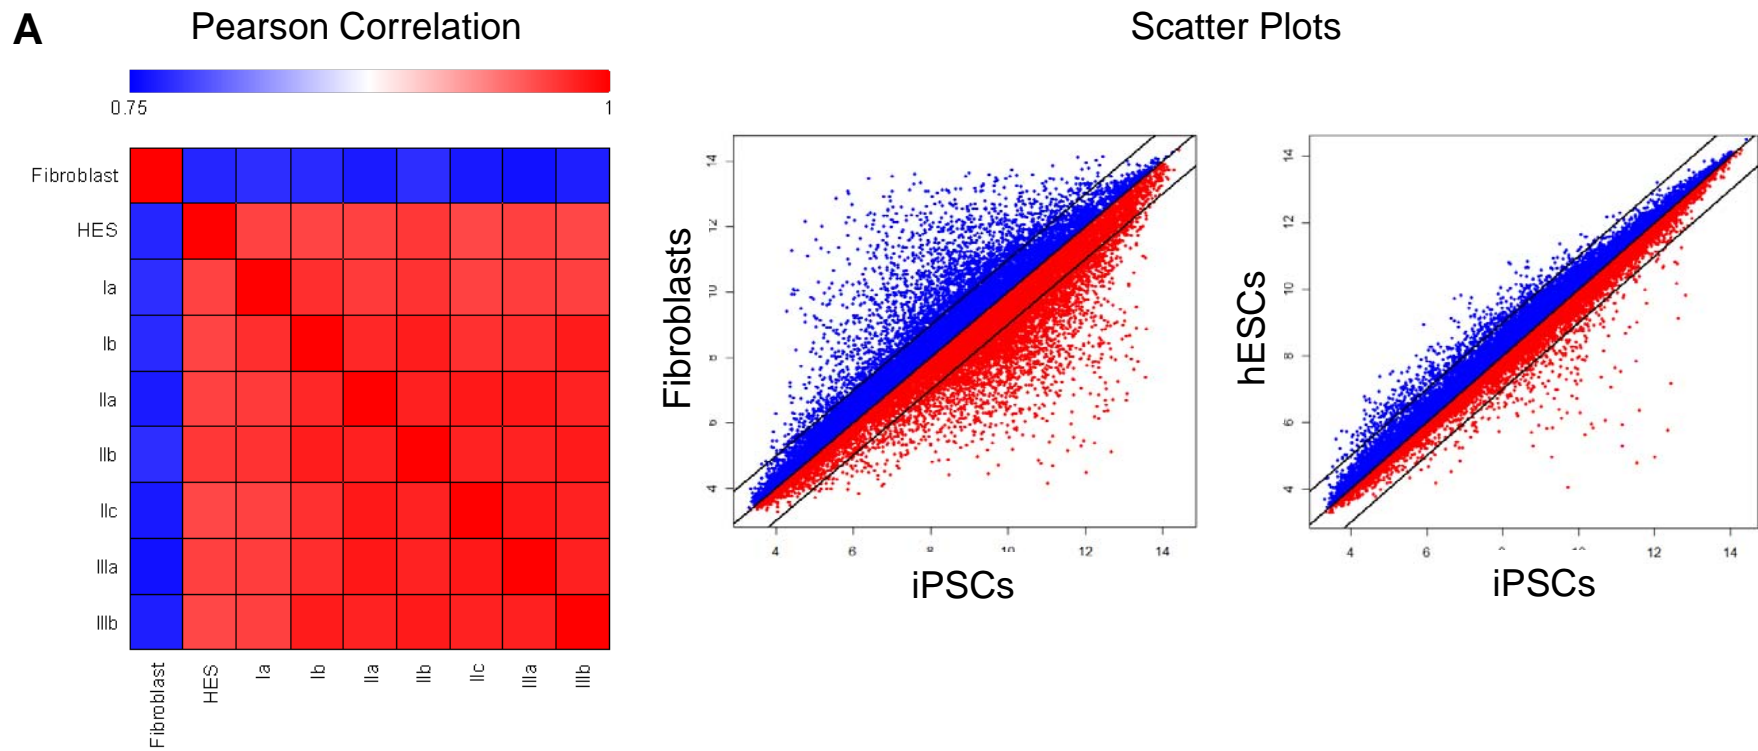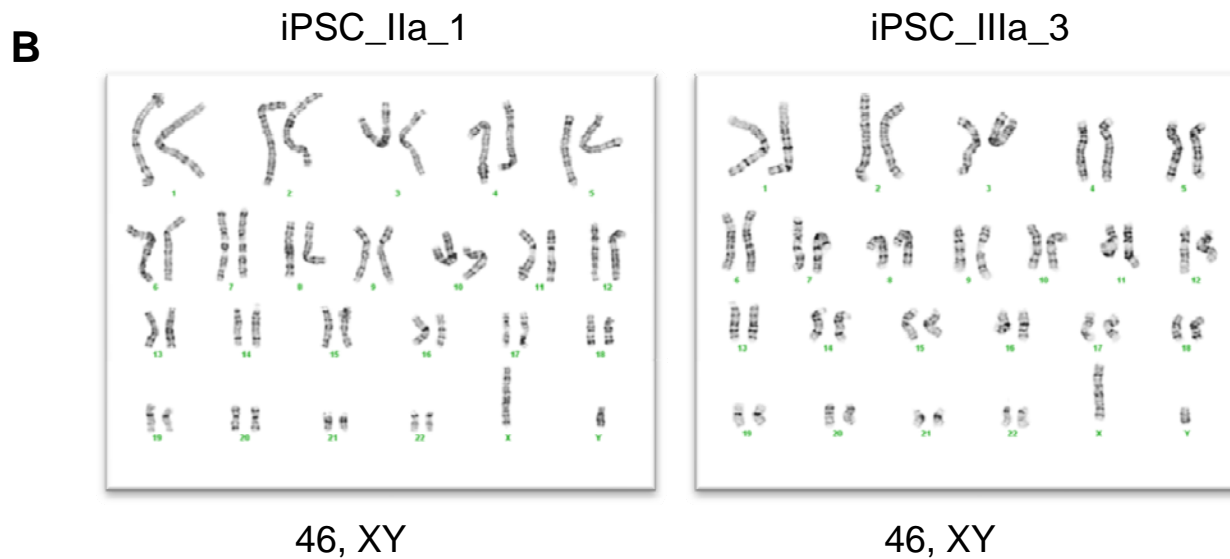

Fig. S3

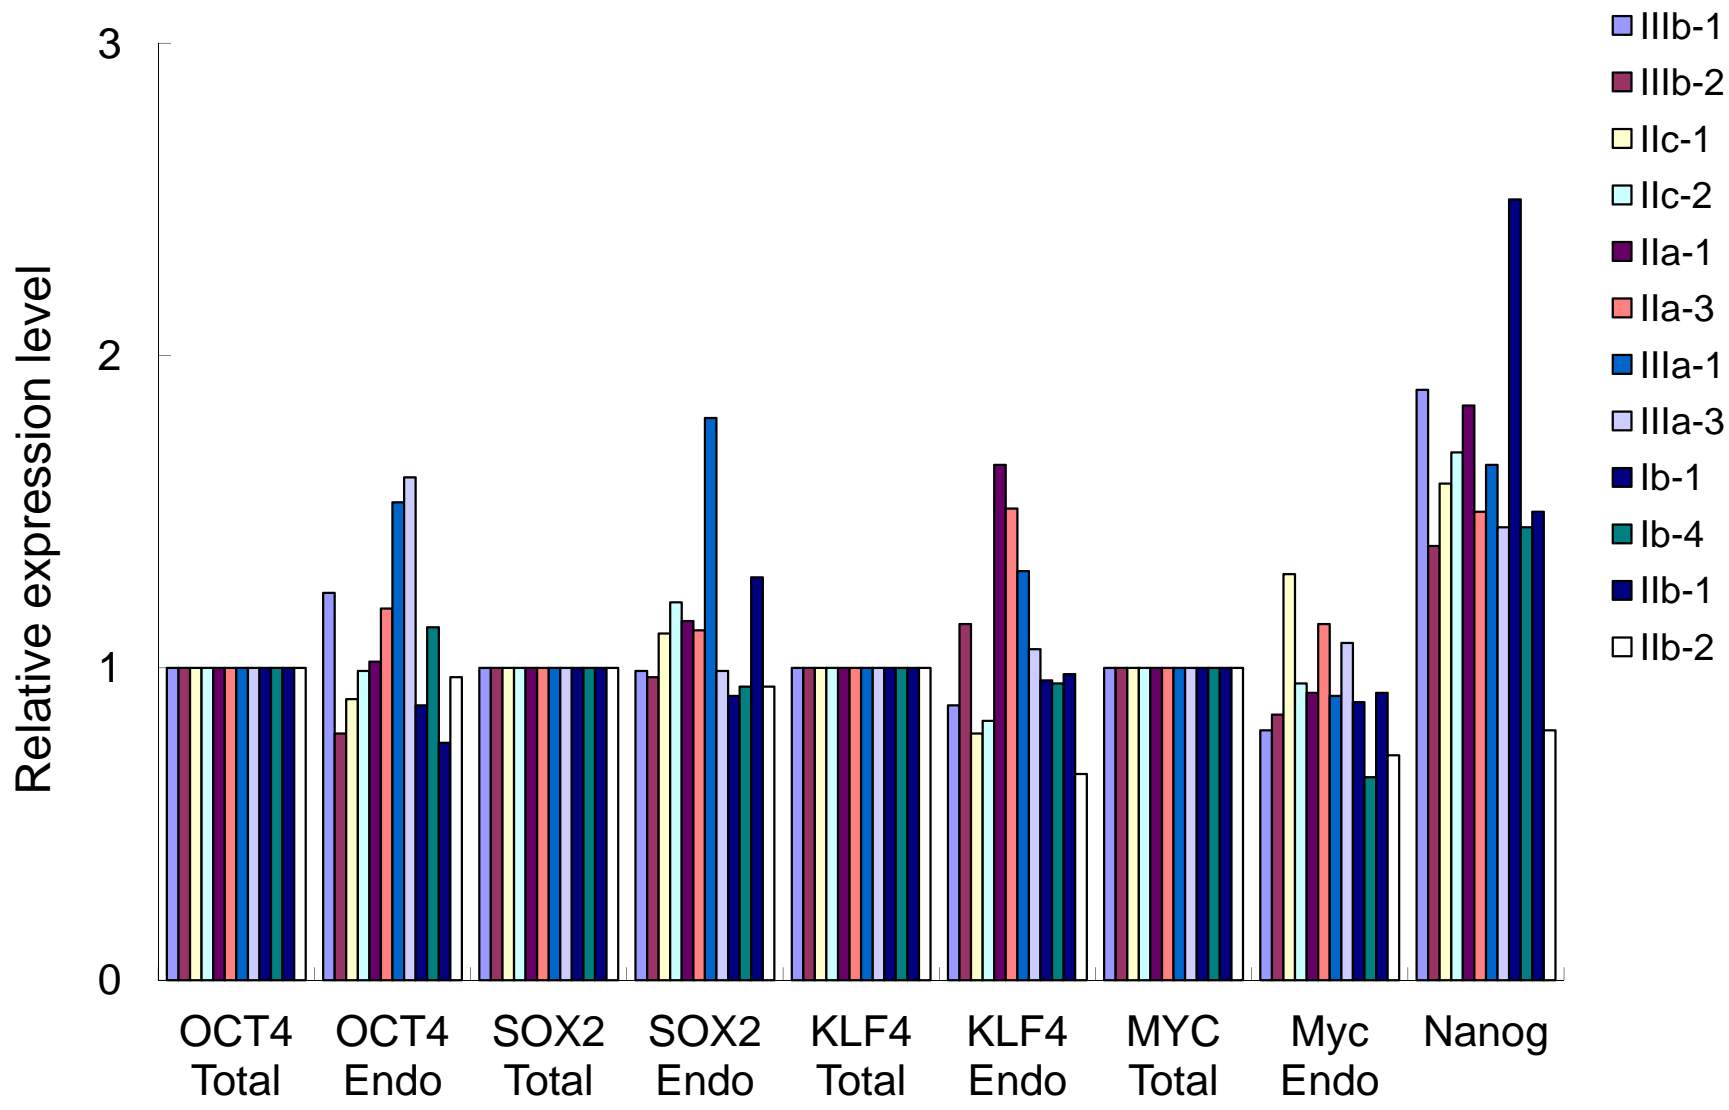

Fig. S4

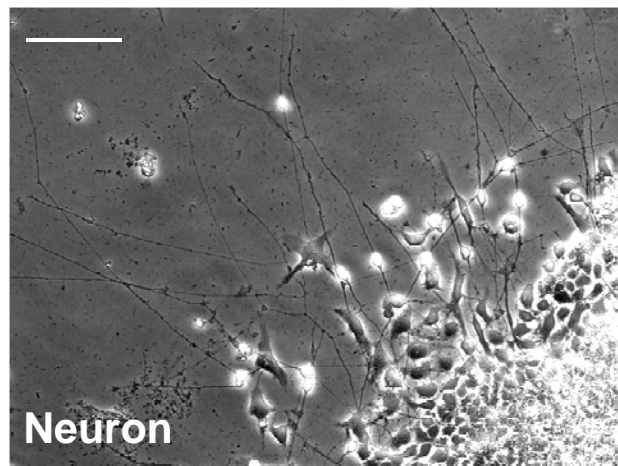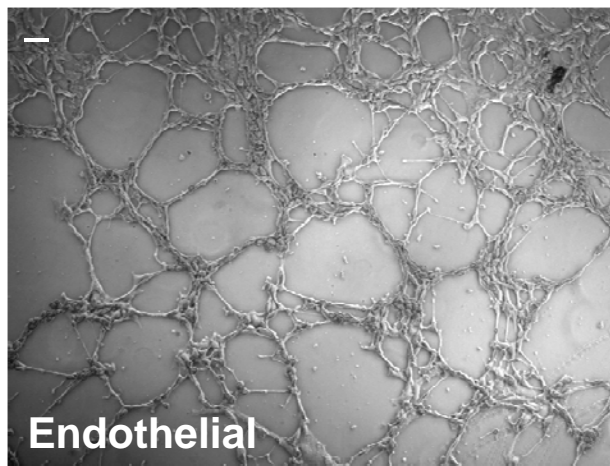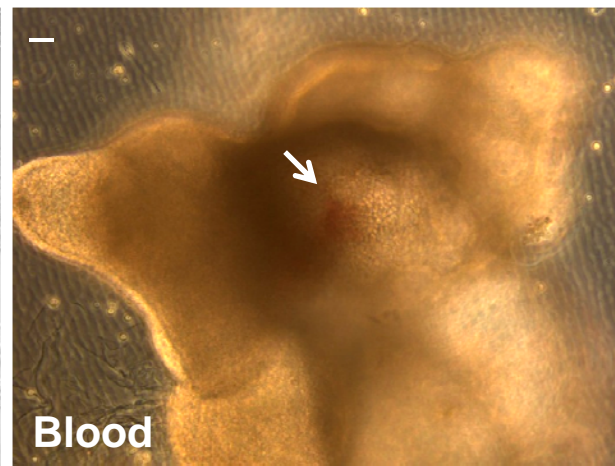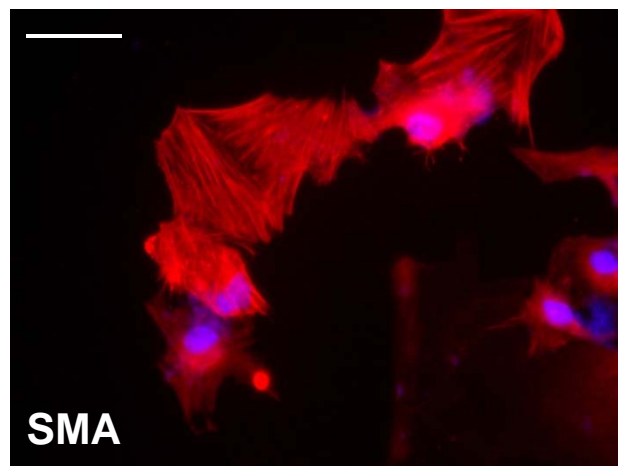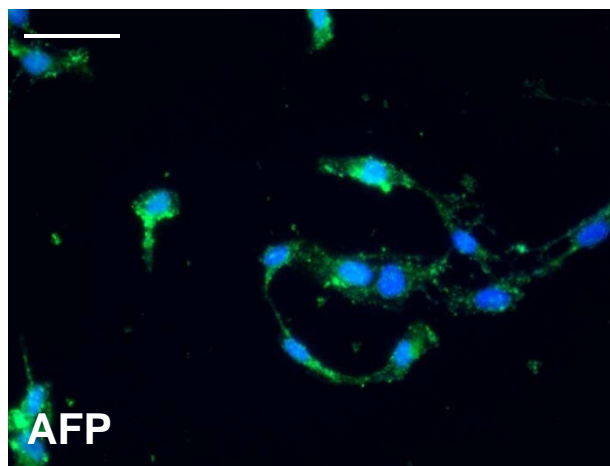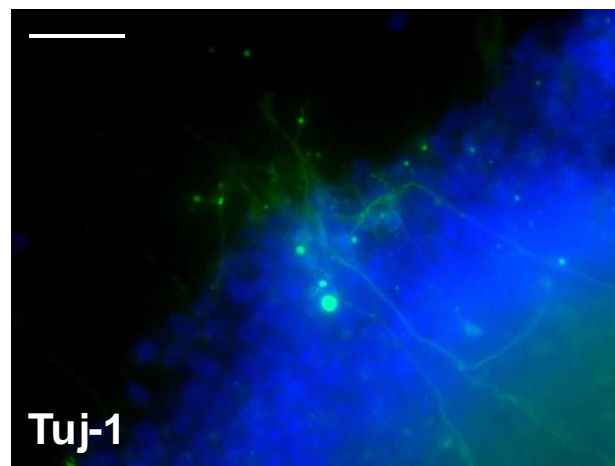

Fig. S5

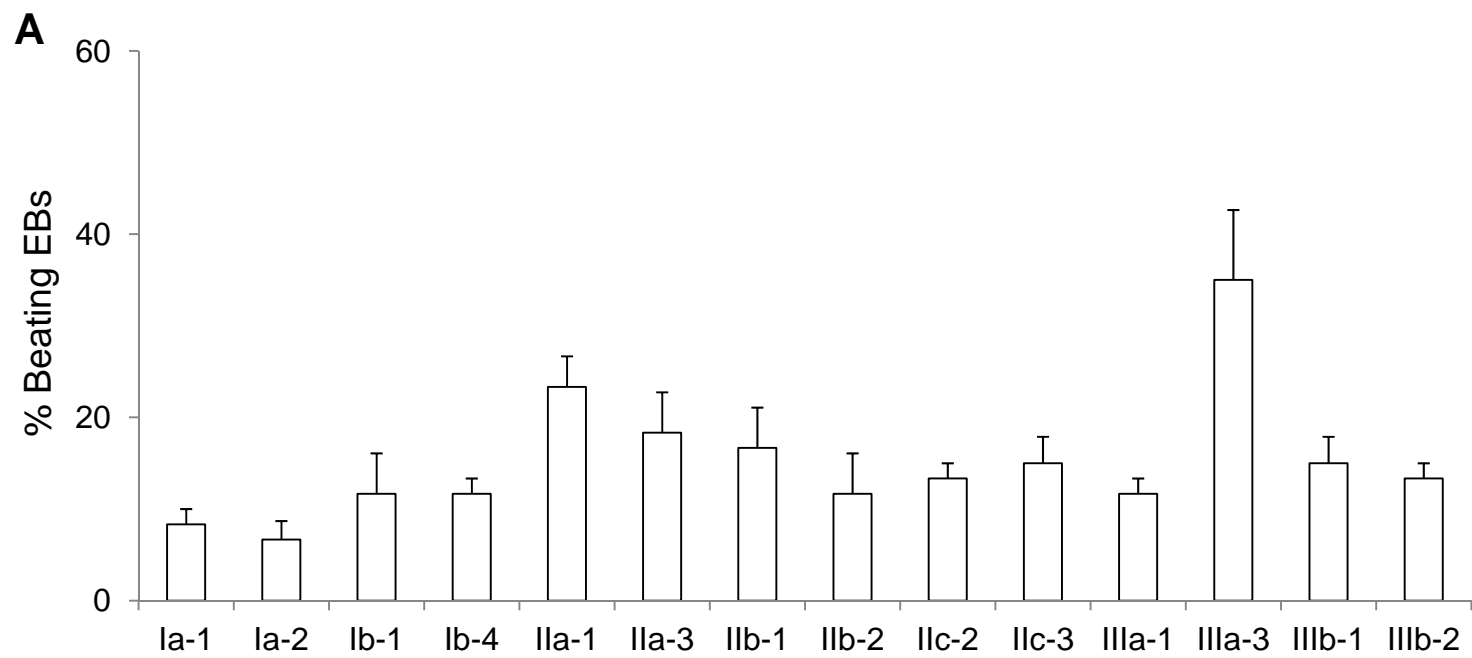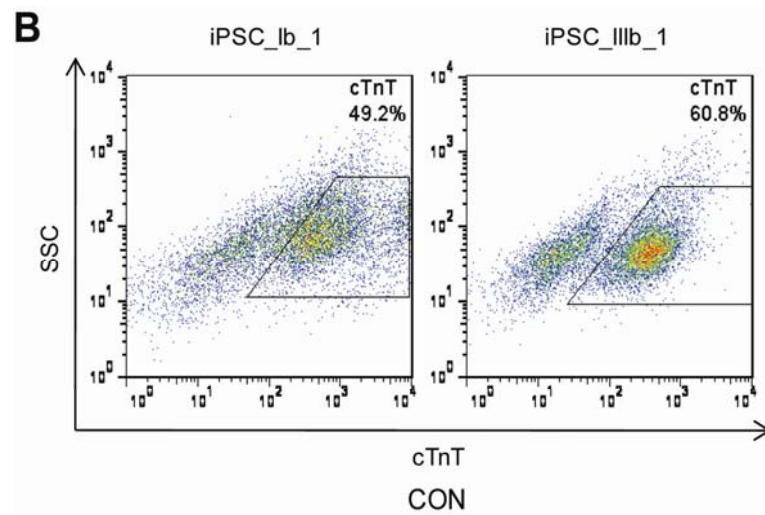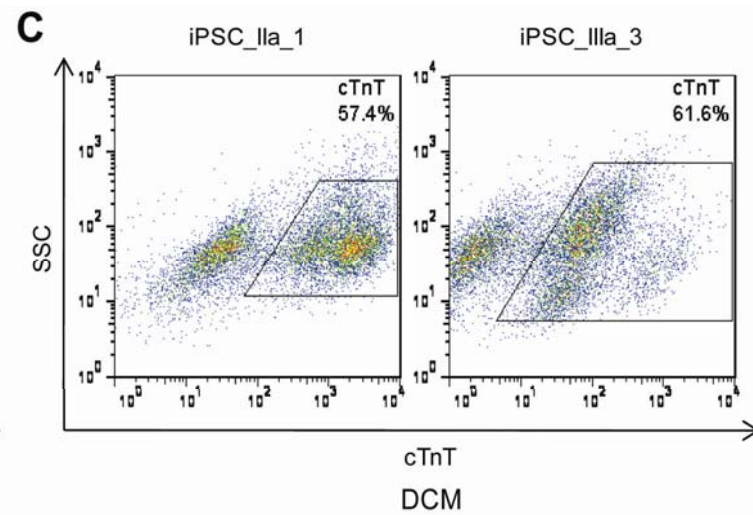

**Fig. S6**

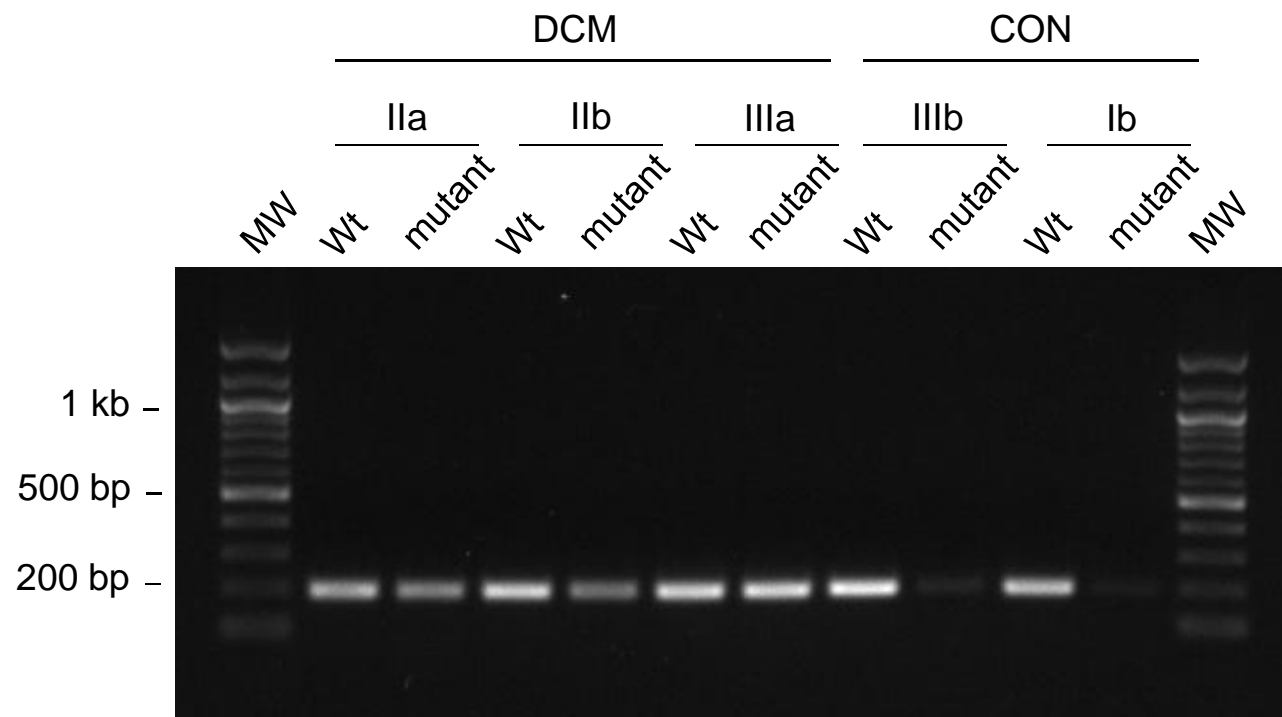

Fig. S7

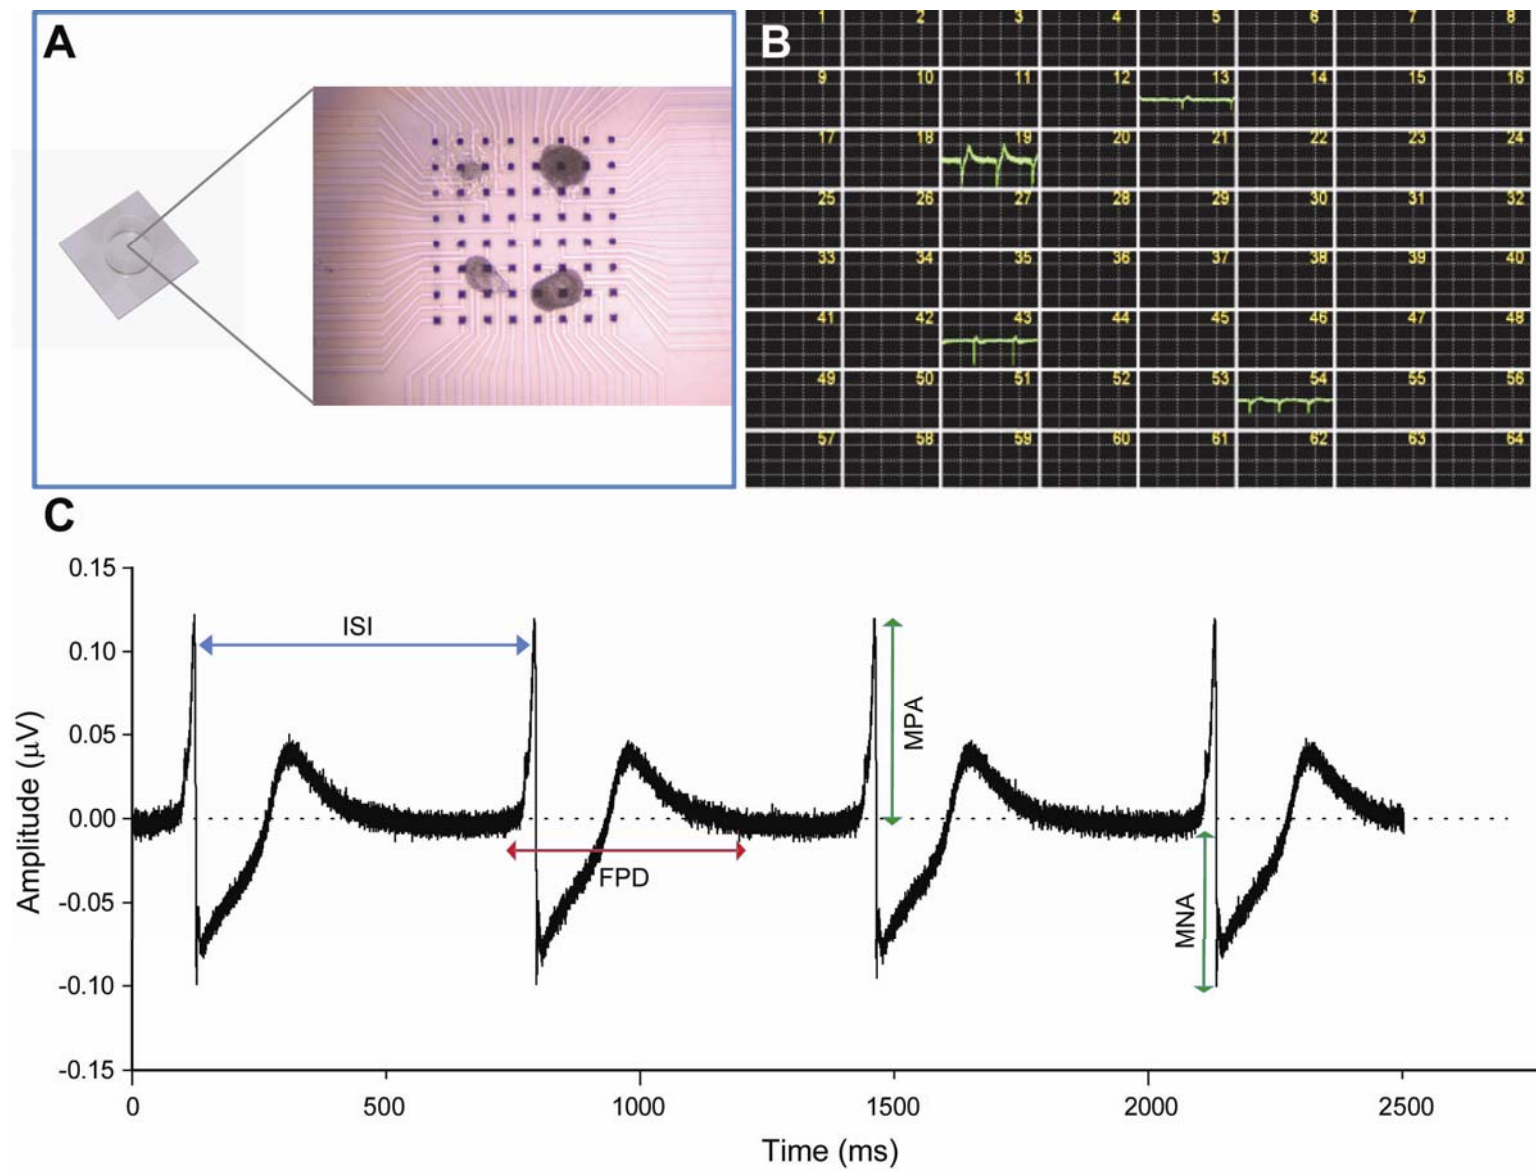

Fig. S8



CON

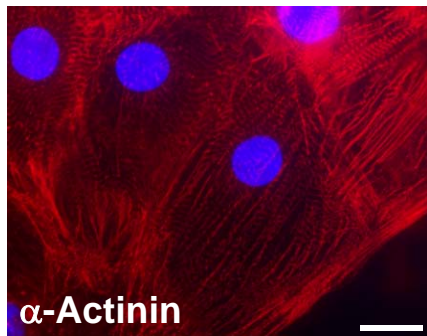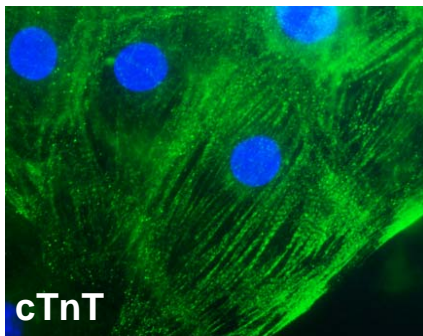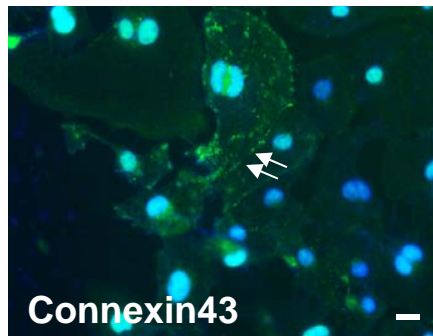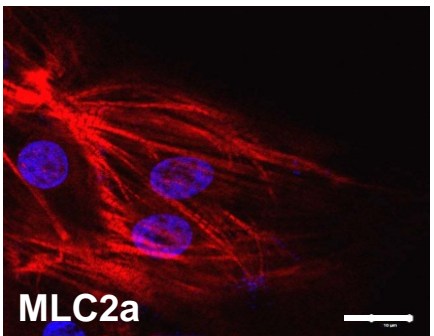

DCM

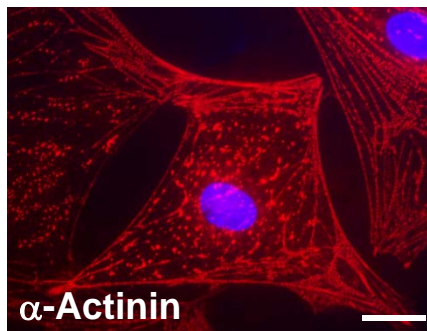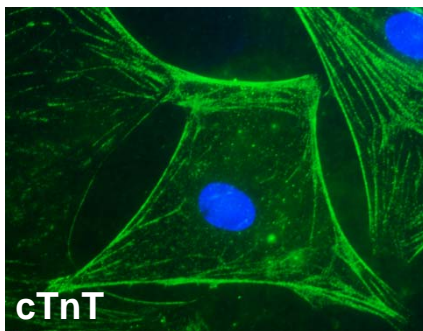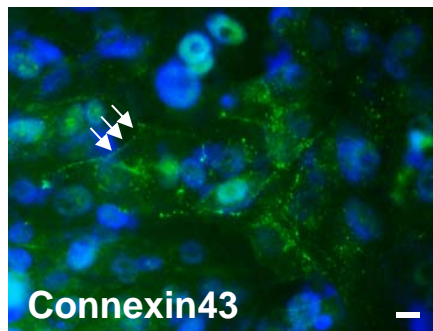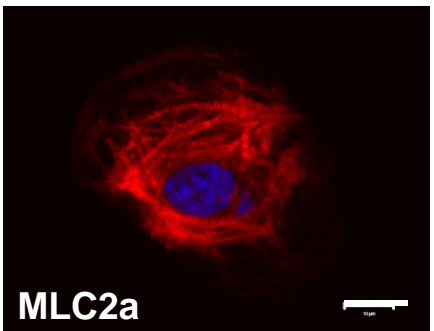

Fig. S9

CON

$\alpha$ -Actinin

cTnT

DCM

$\alpha$ -Actinin

cTnT

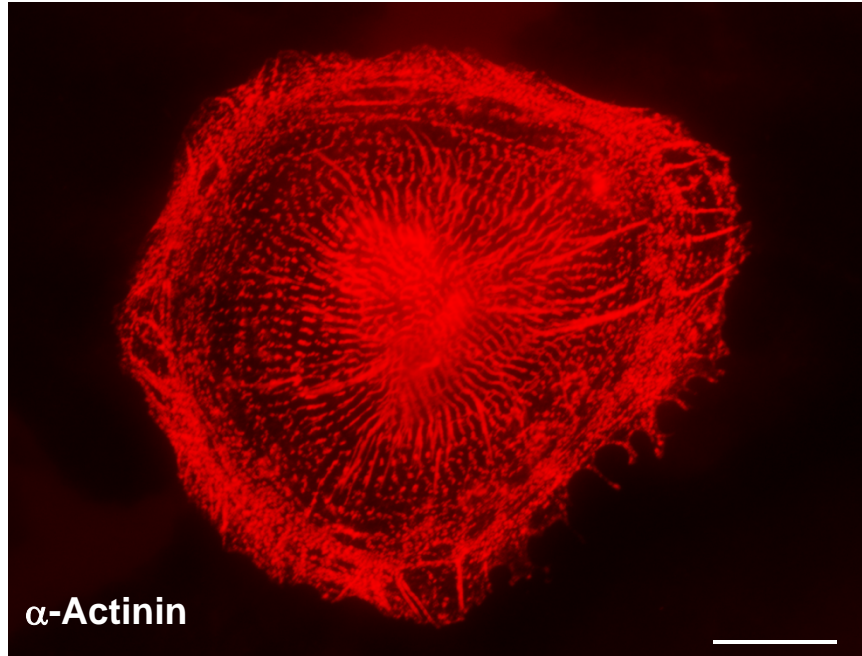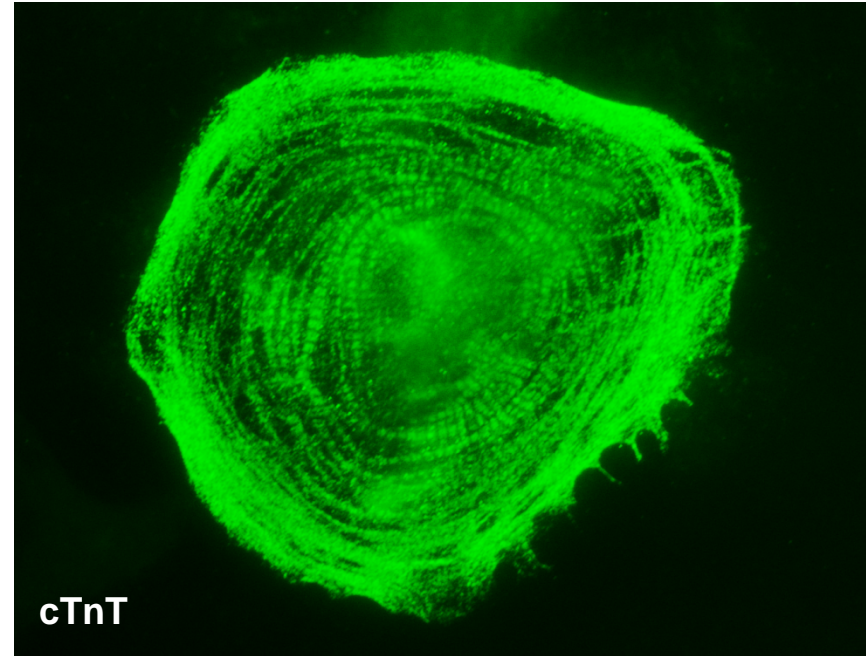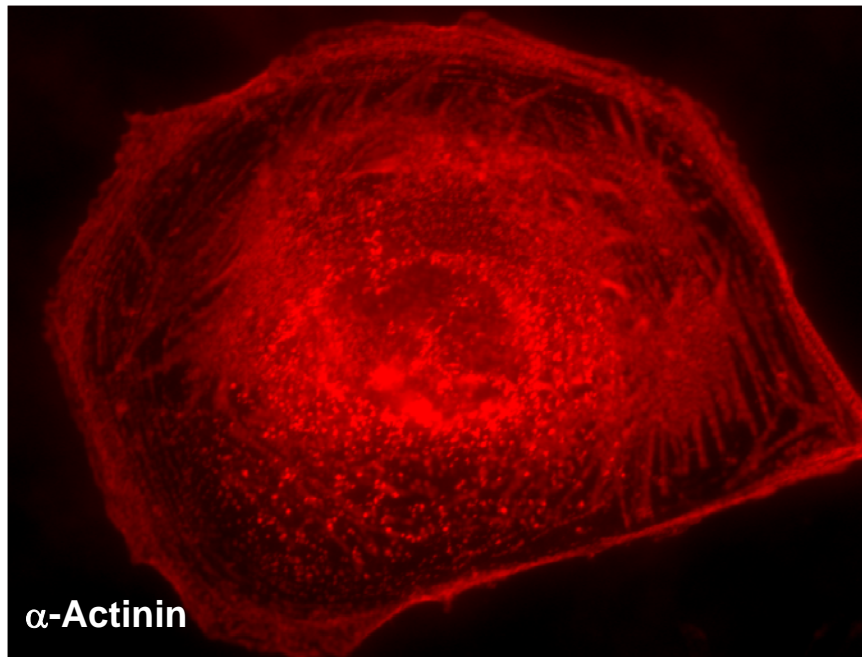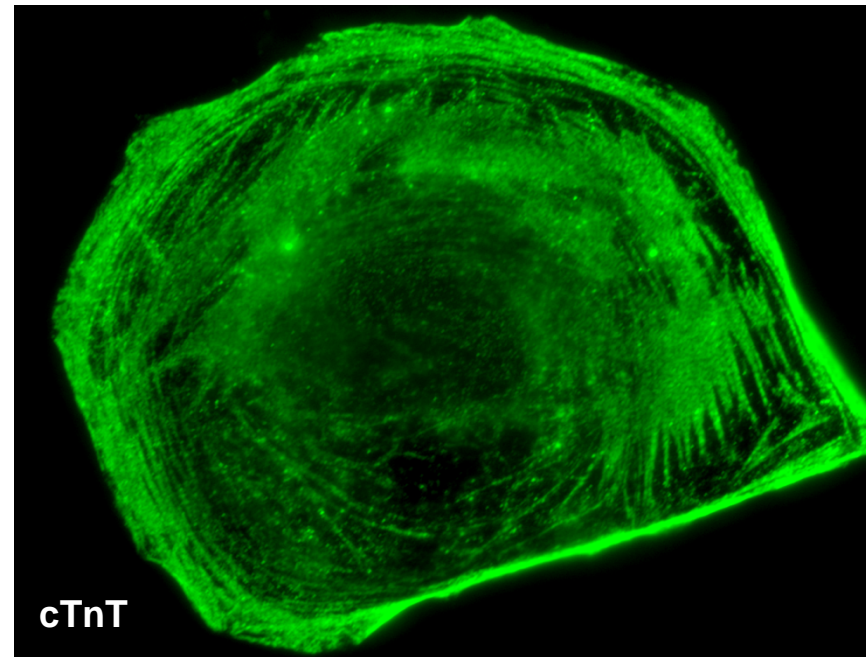

Fig. S10A

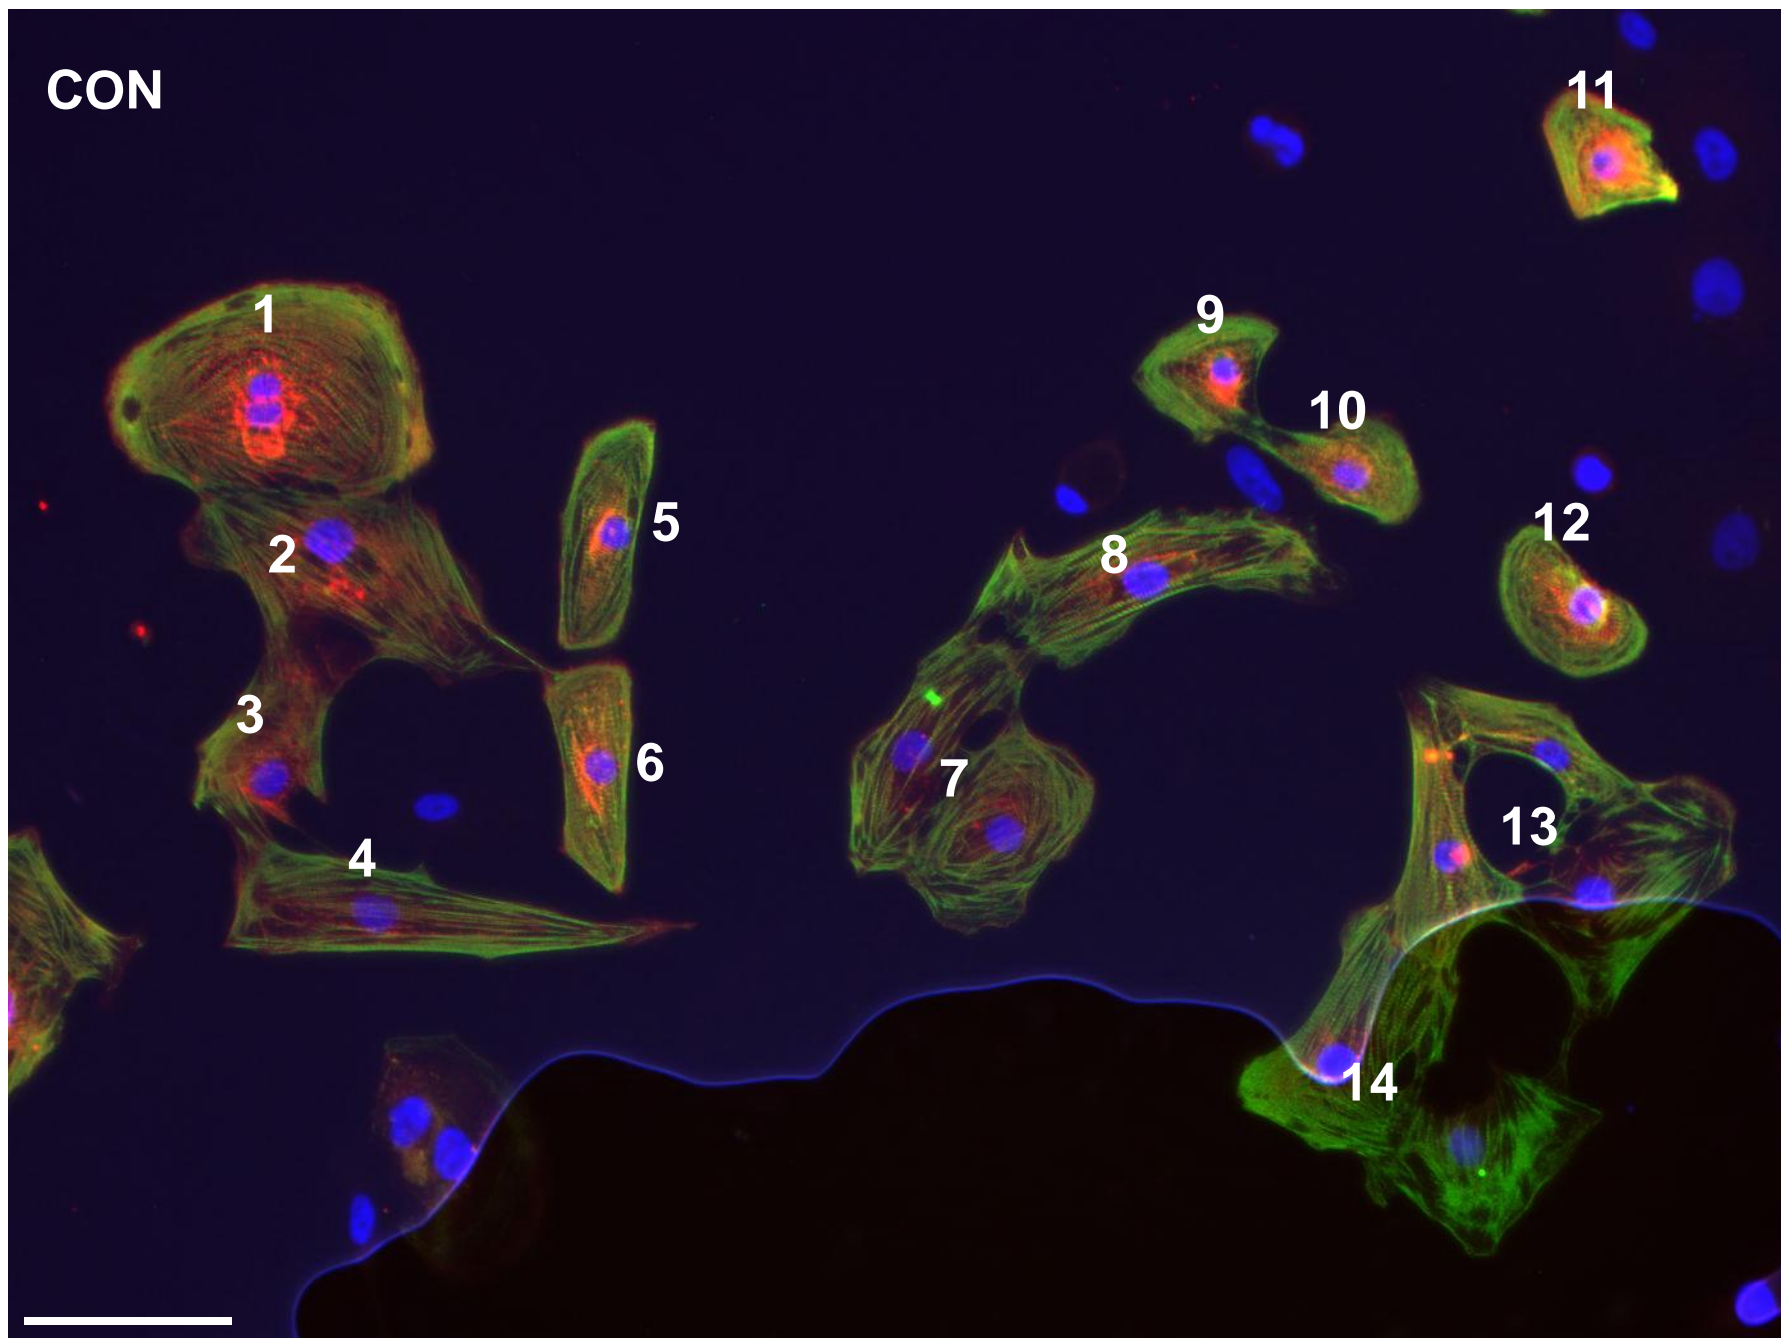

**Fig. S10B**

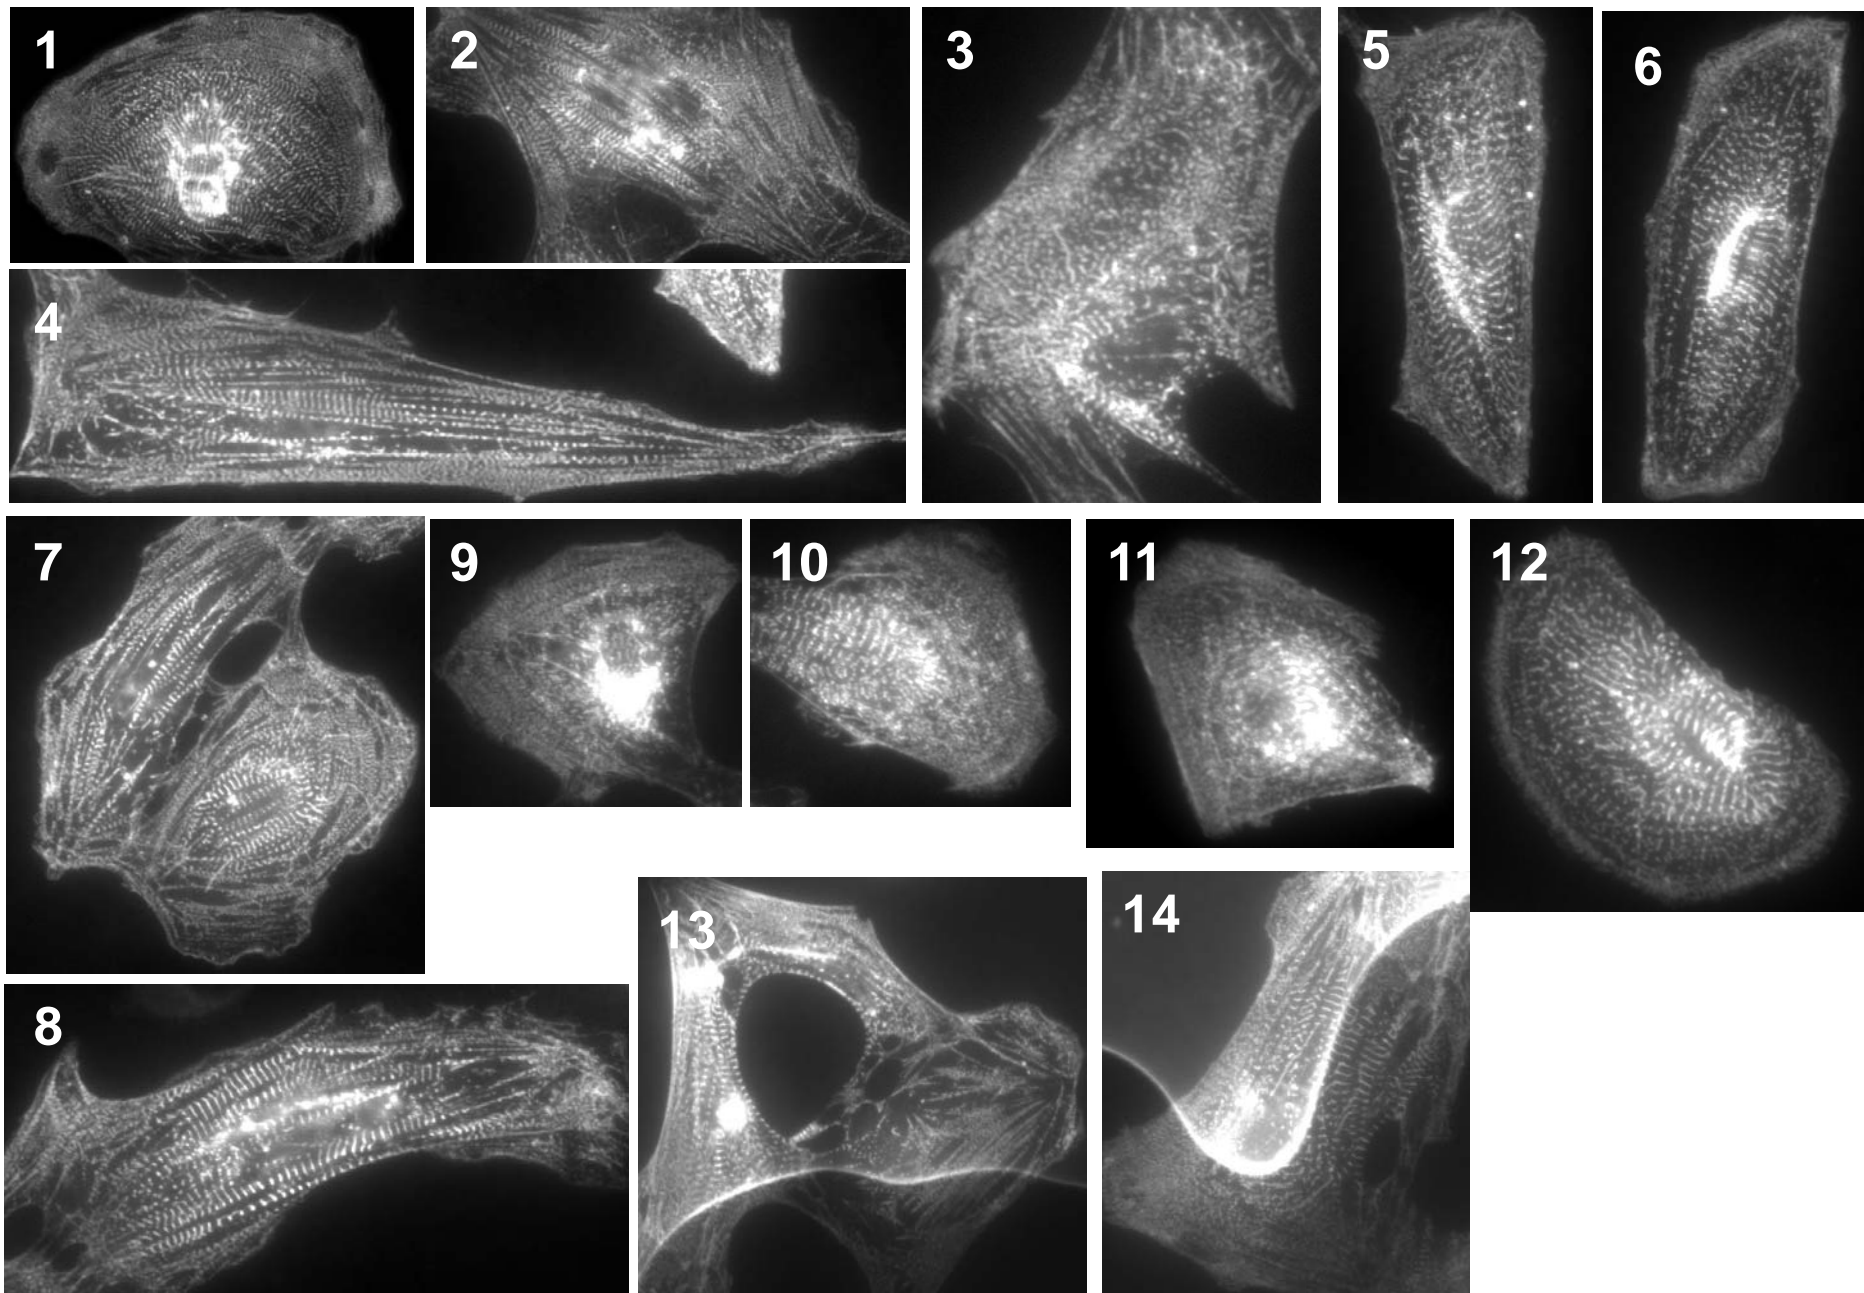

Fig. S10C

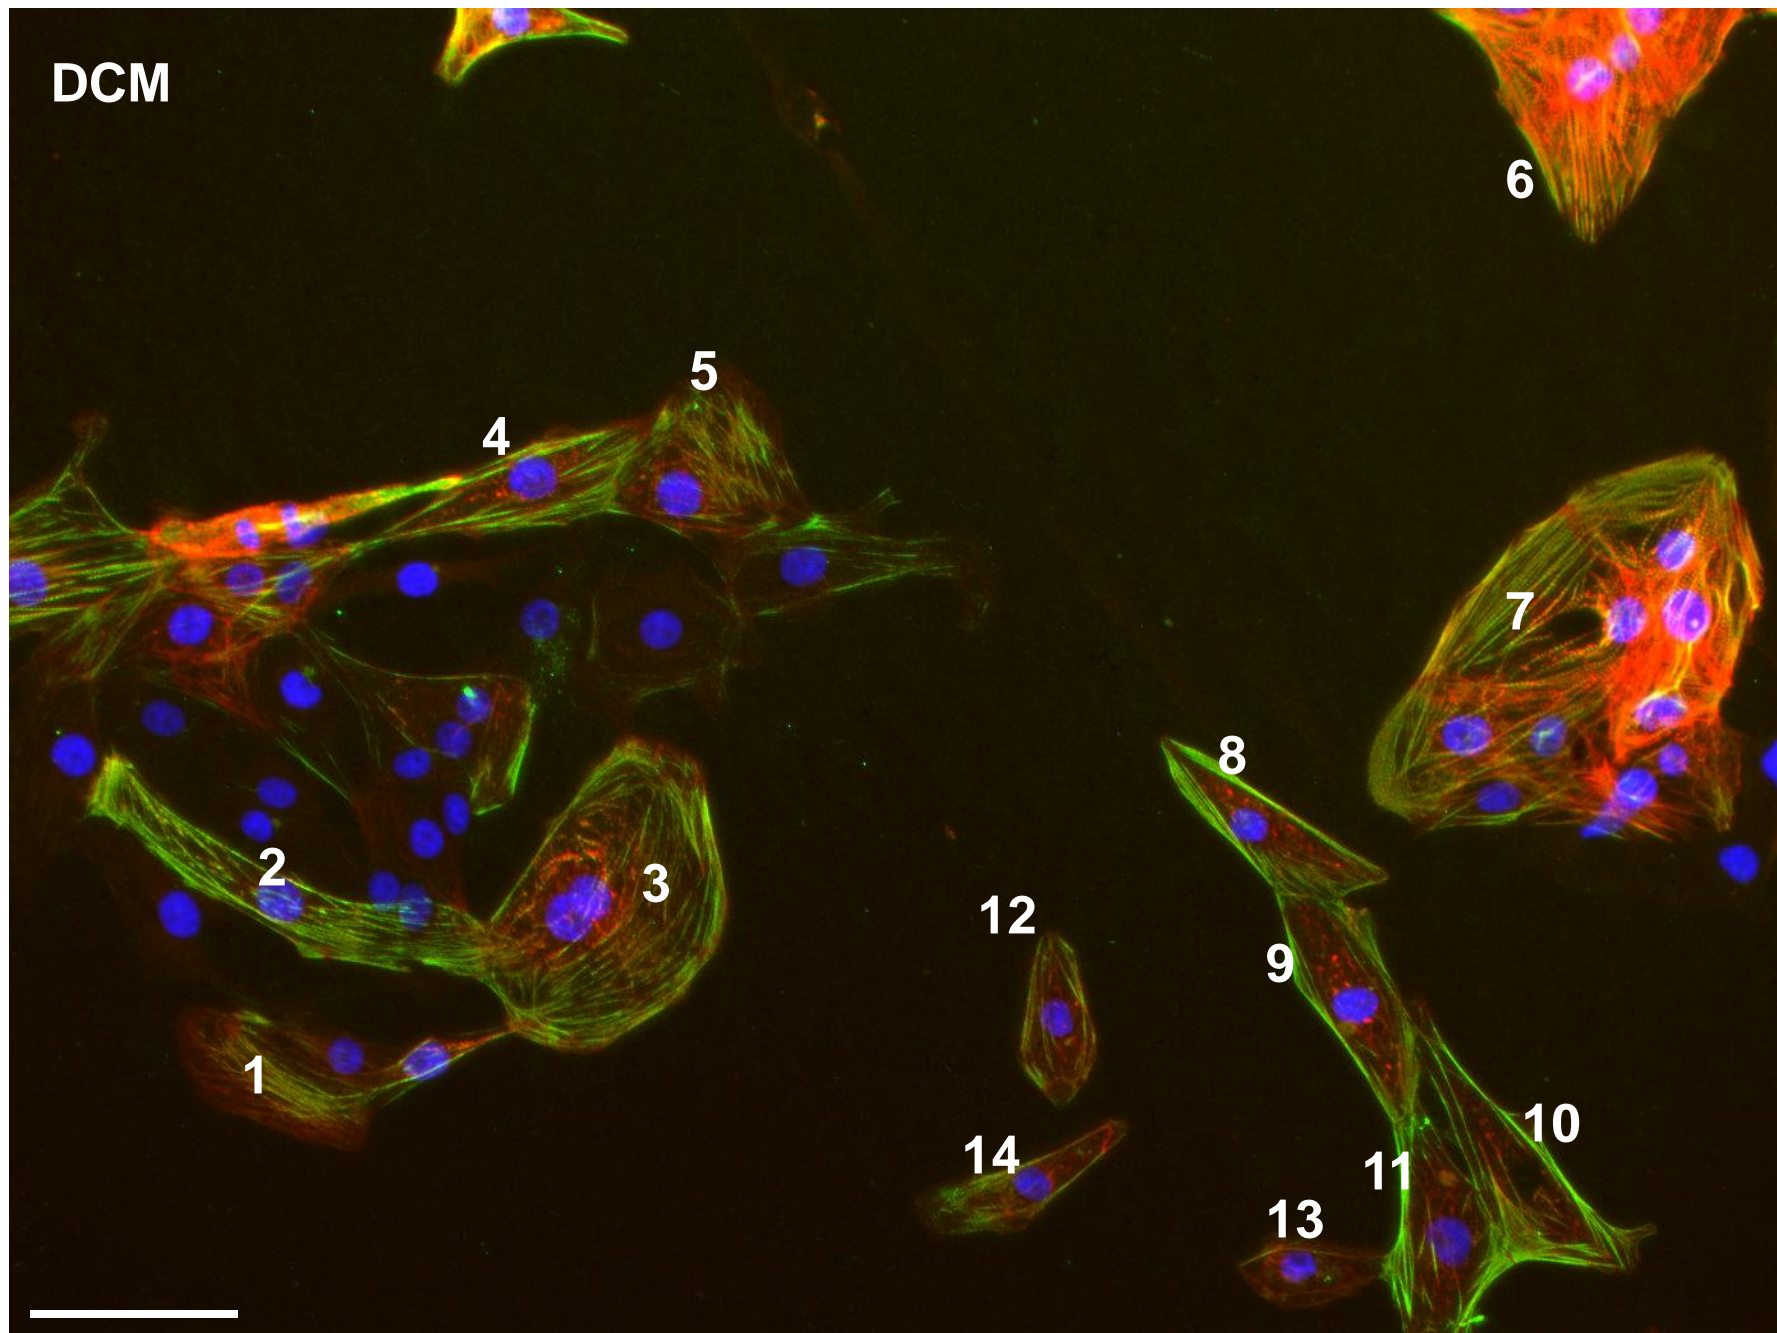

**Fig. S10D**

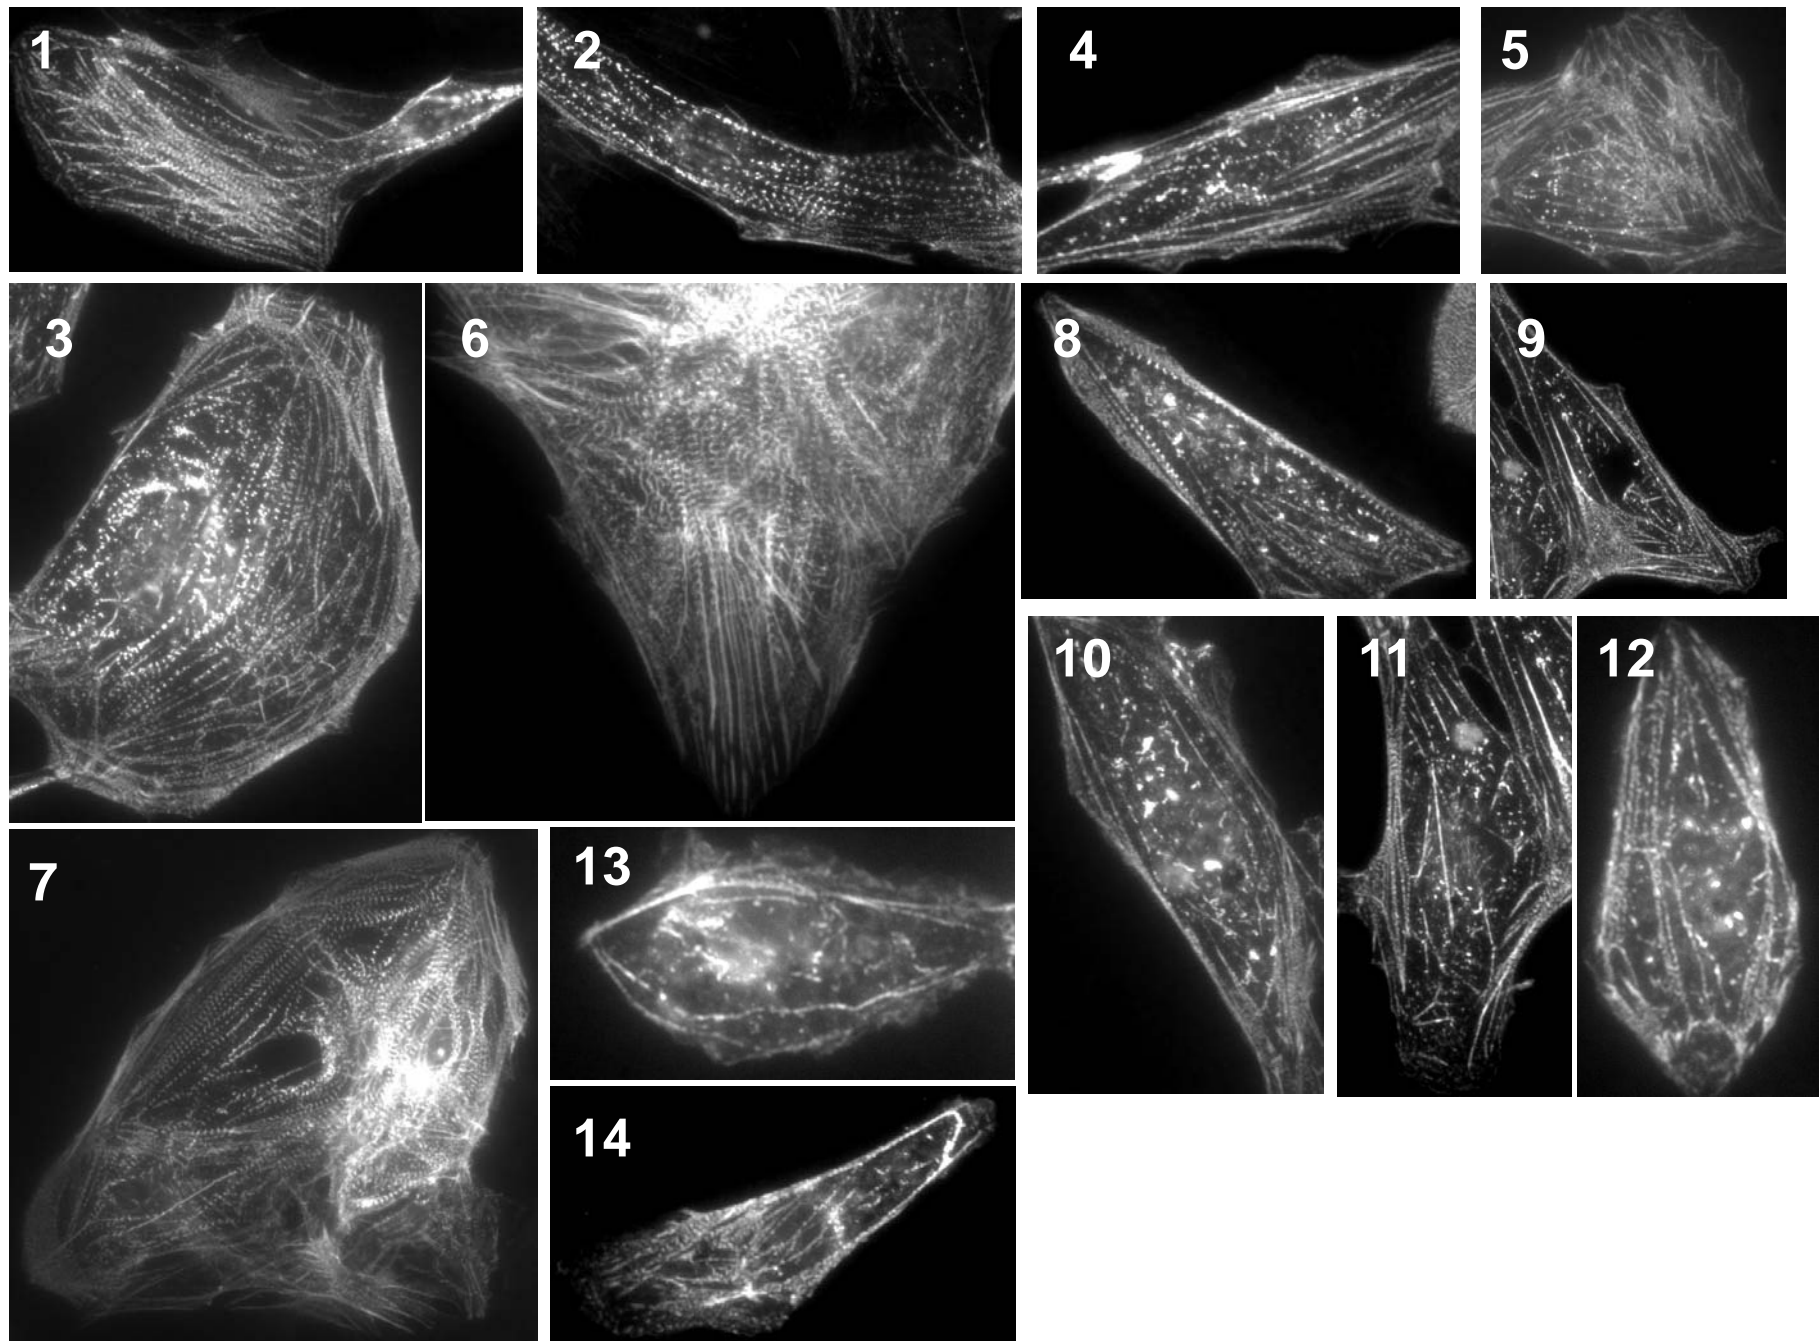

Fig. S10E

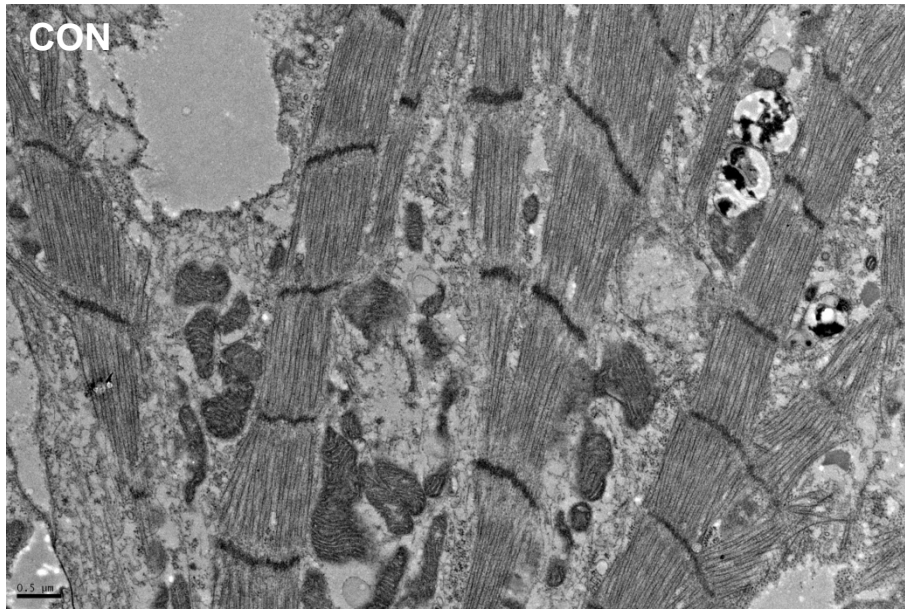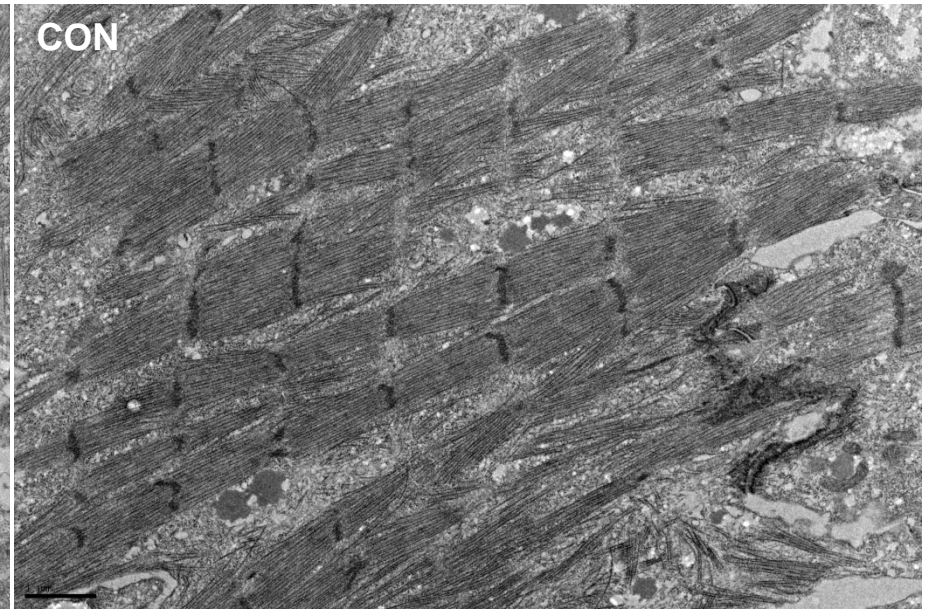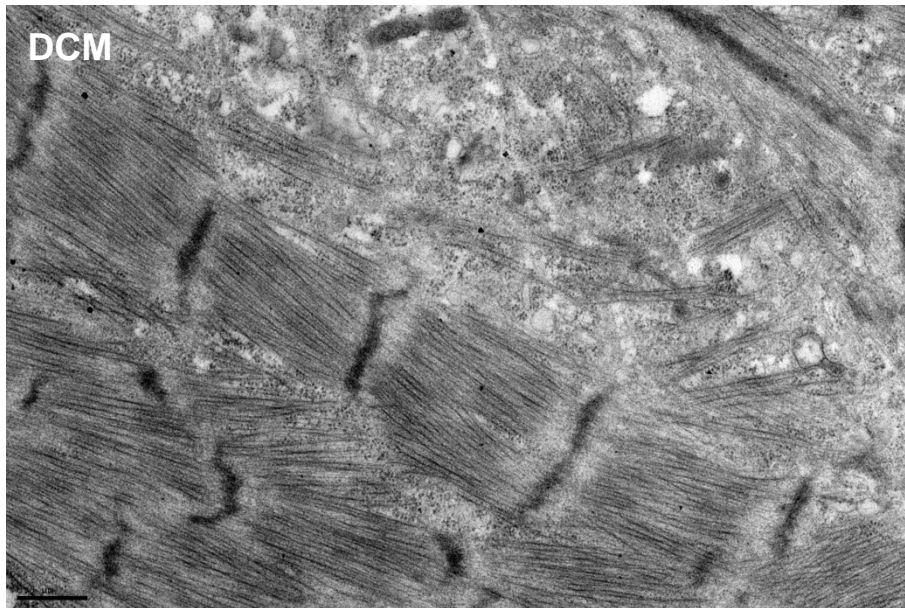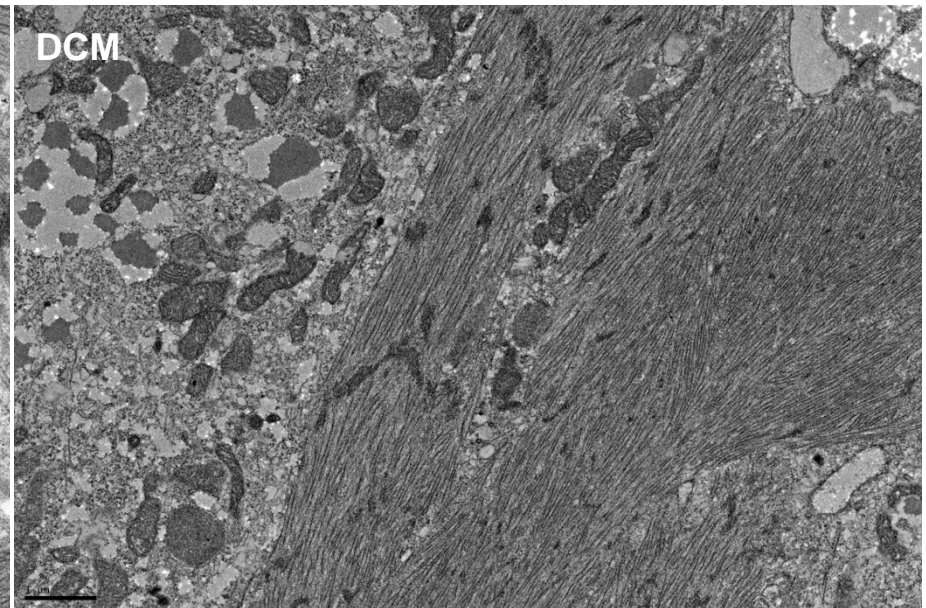

Fig. S10F

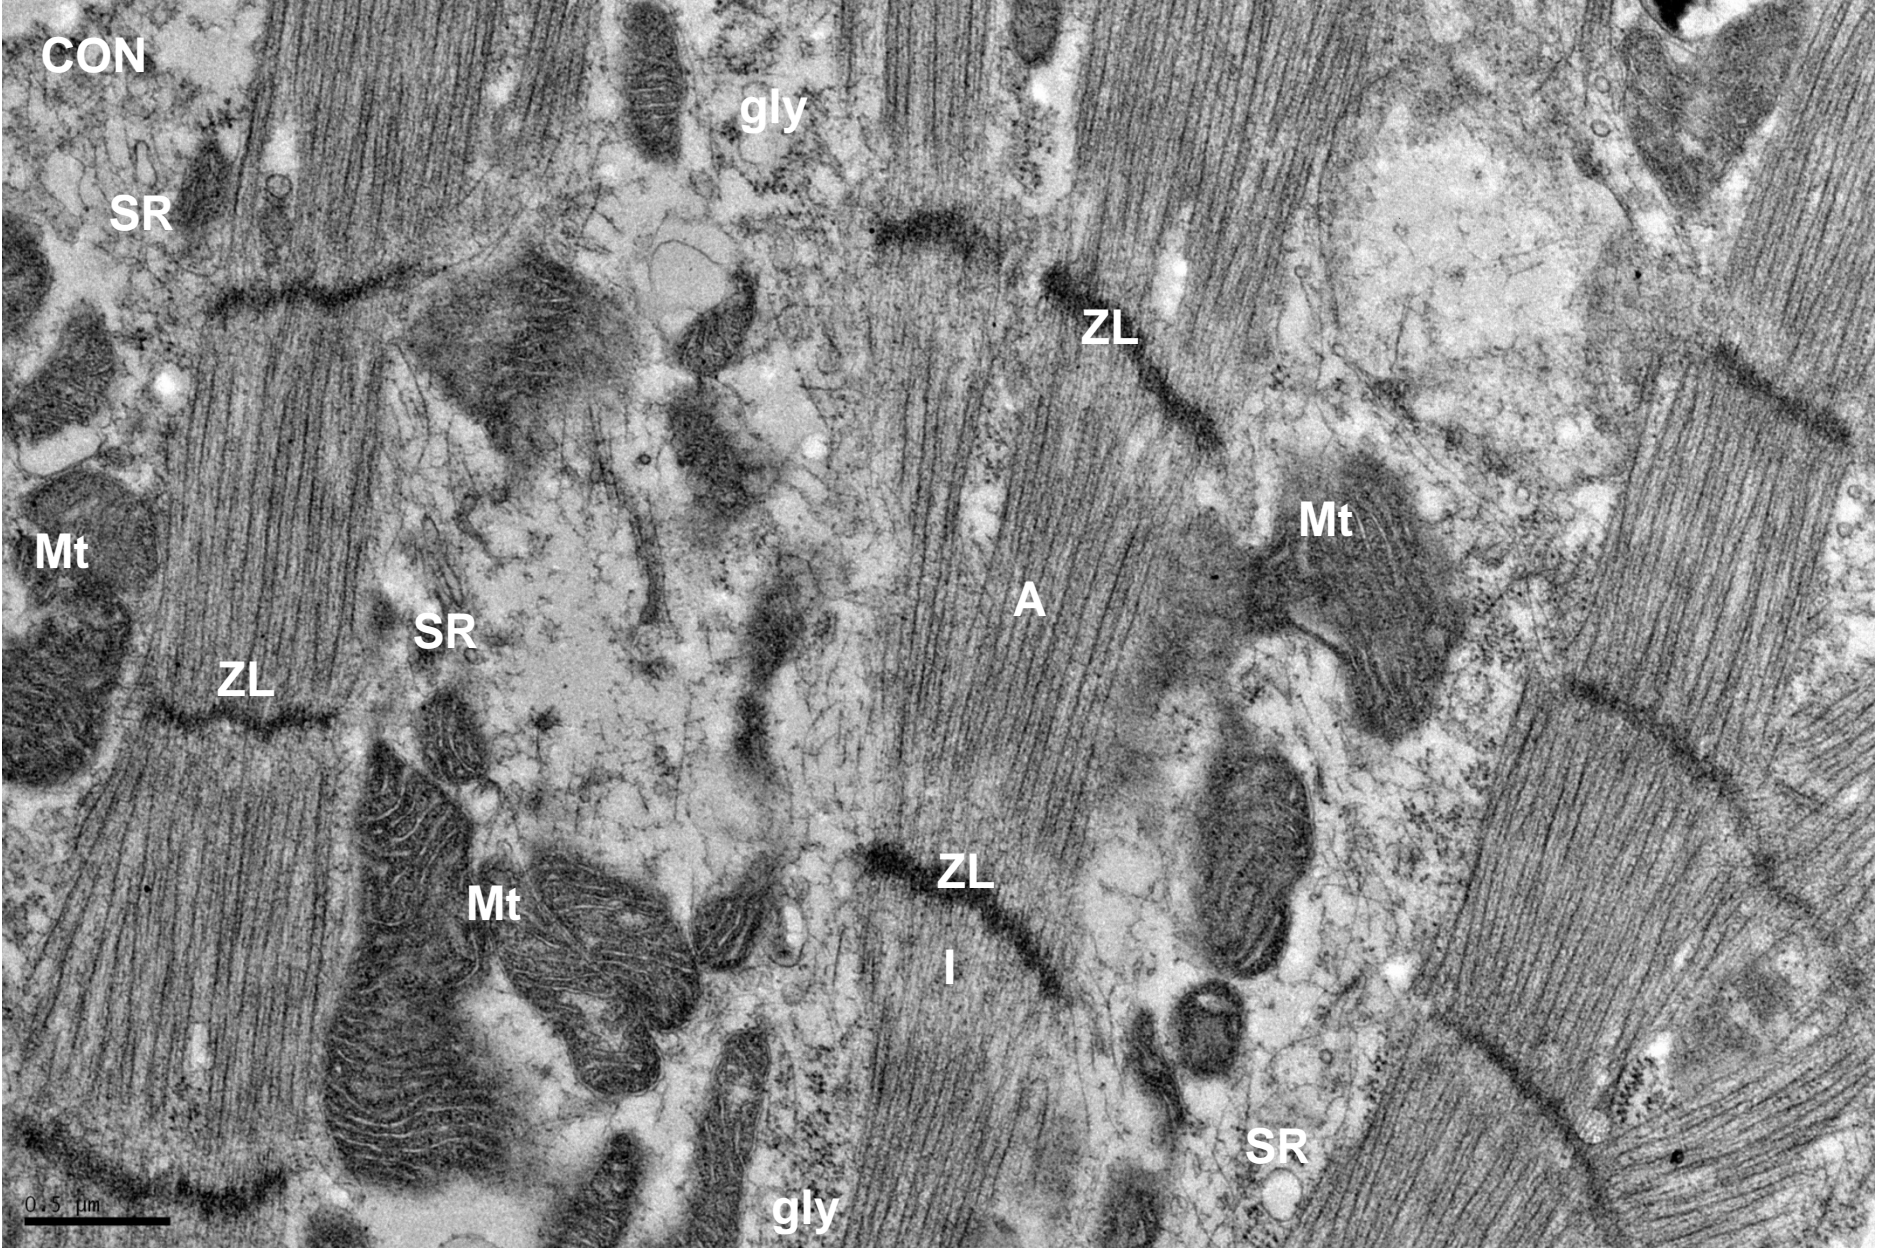

Fig. S10G



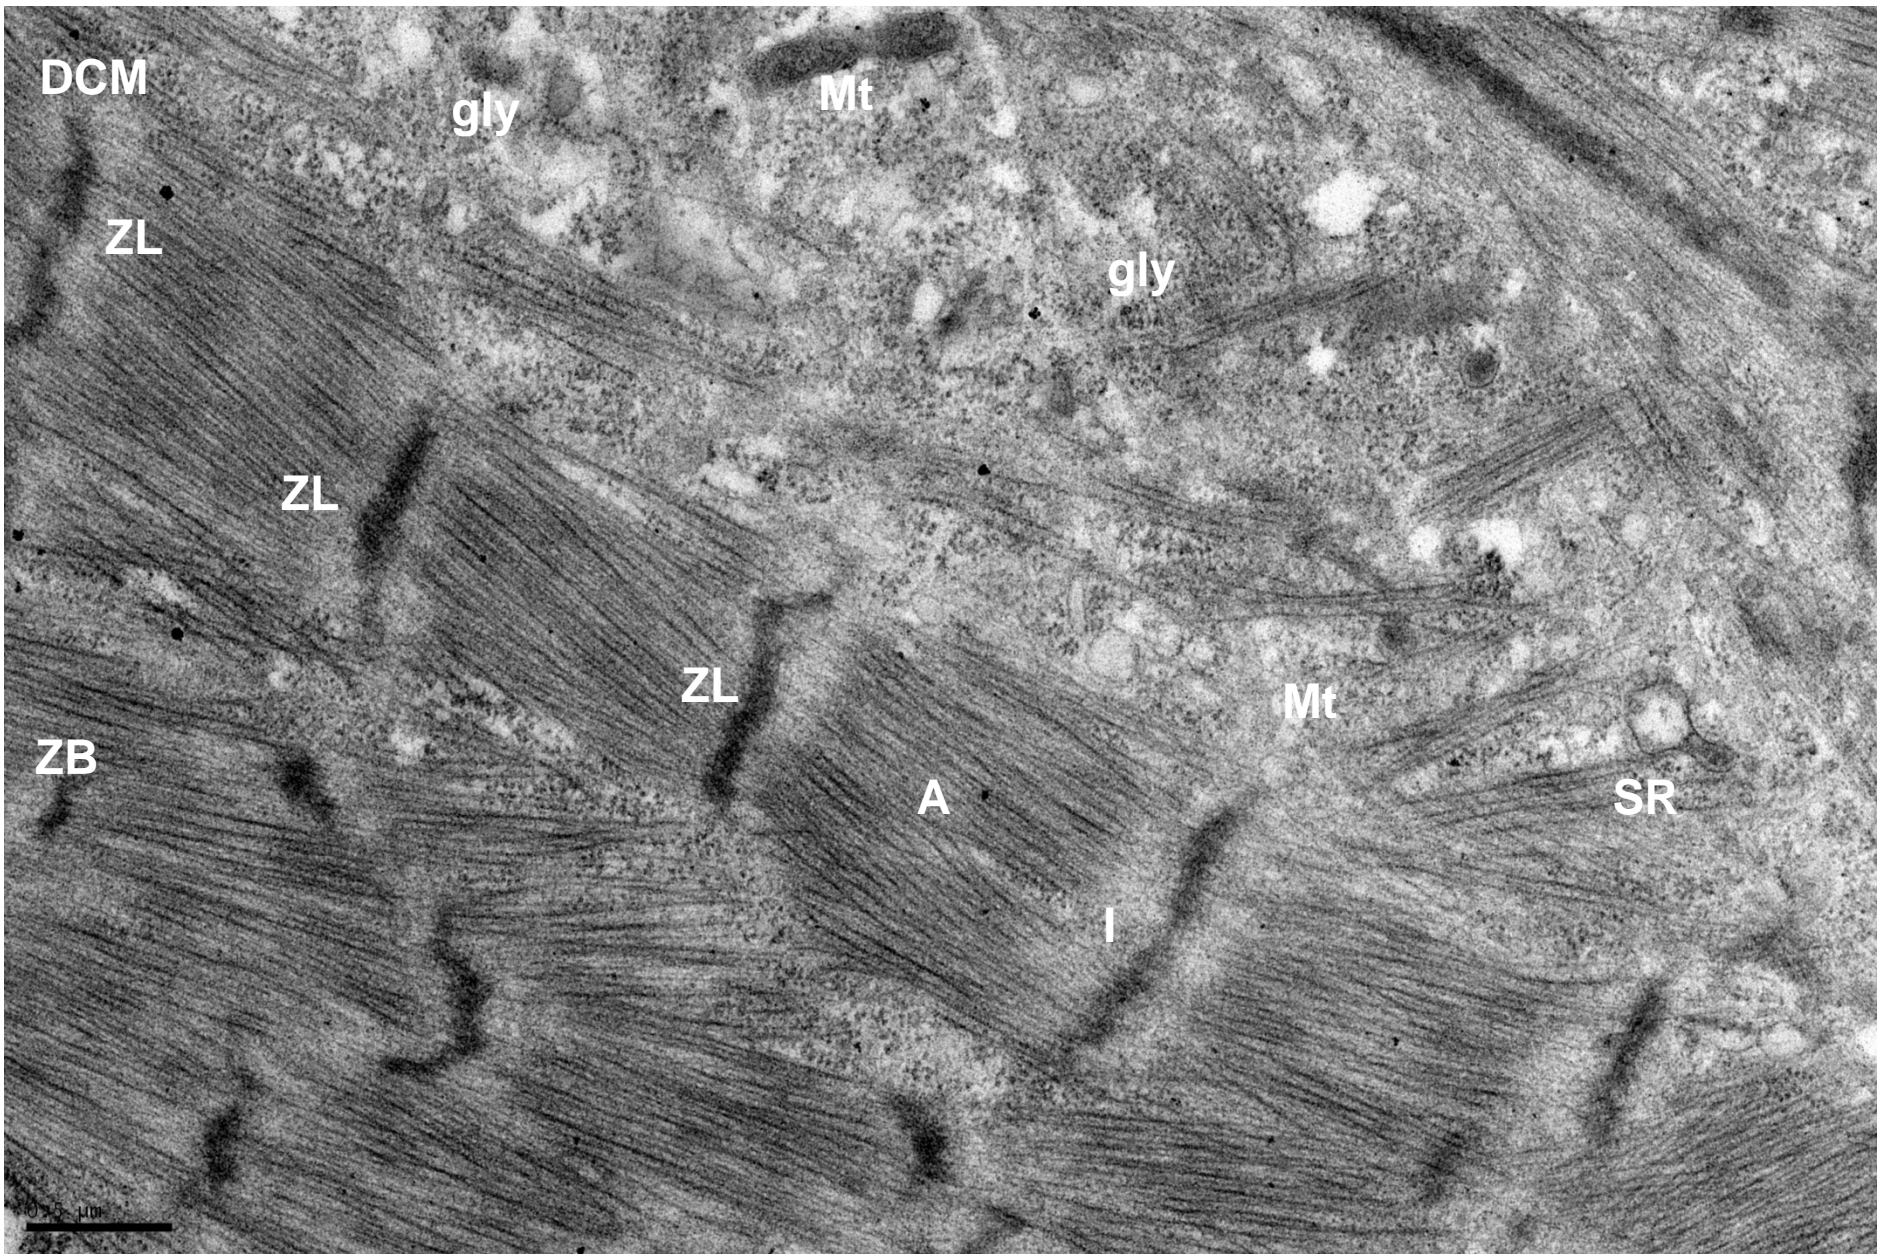

**Fig. S10H**

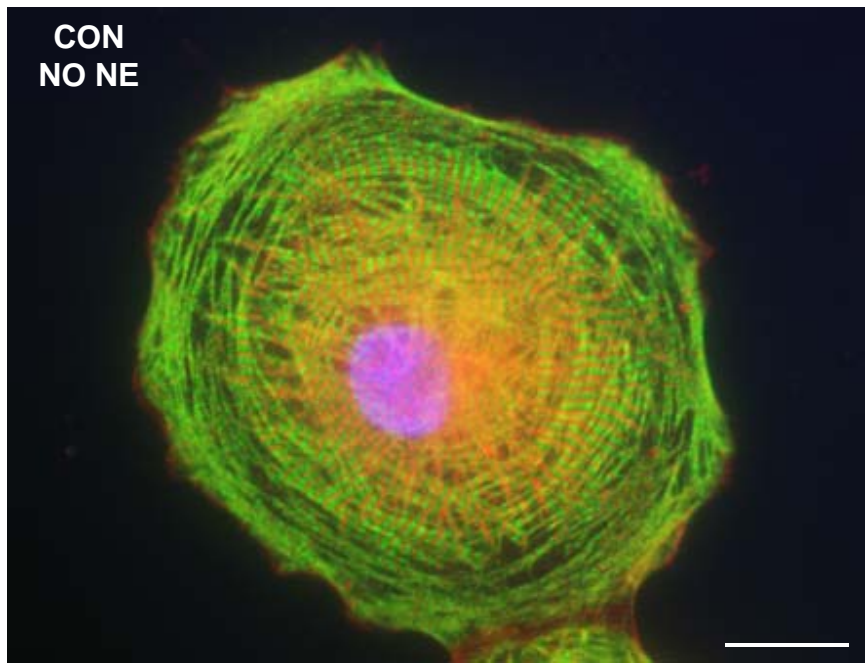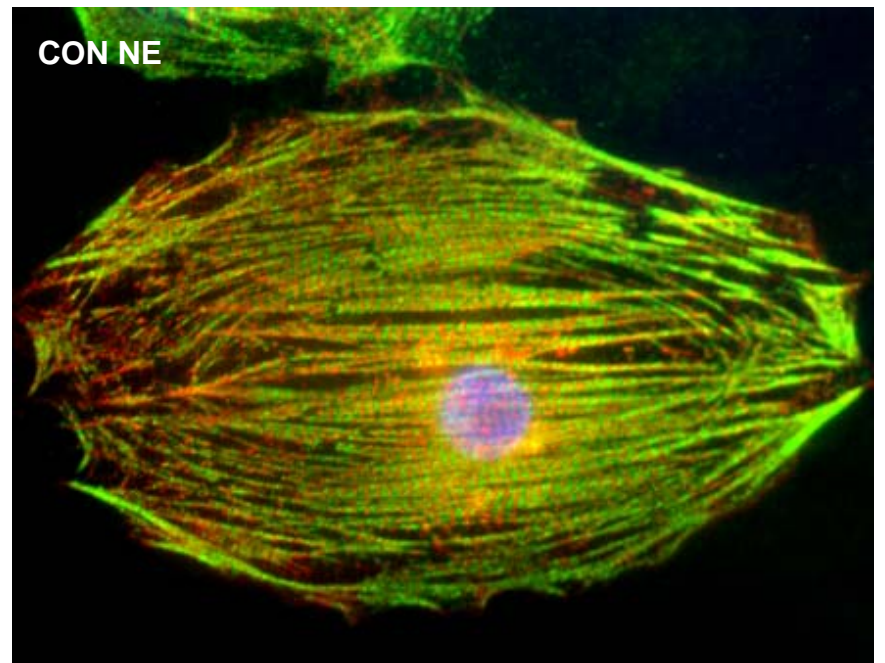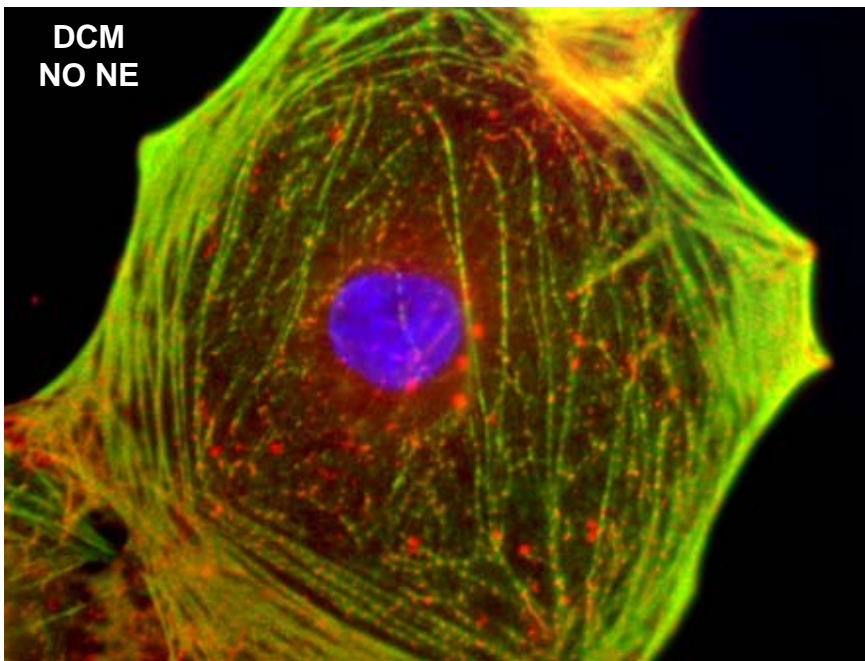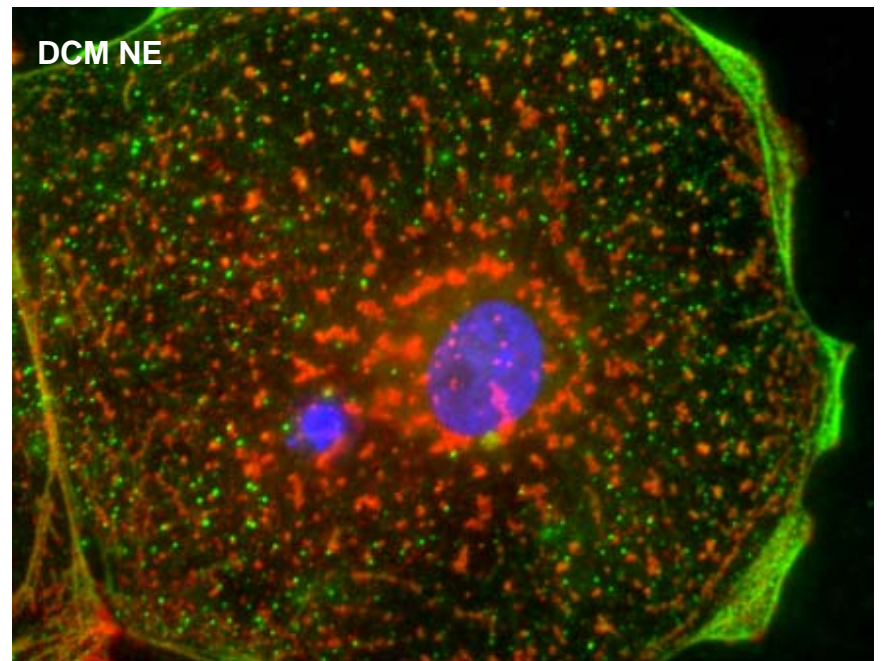

Fig. S11A

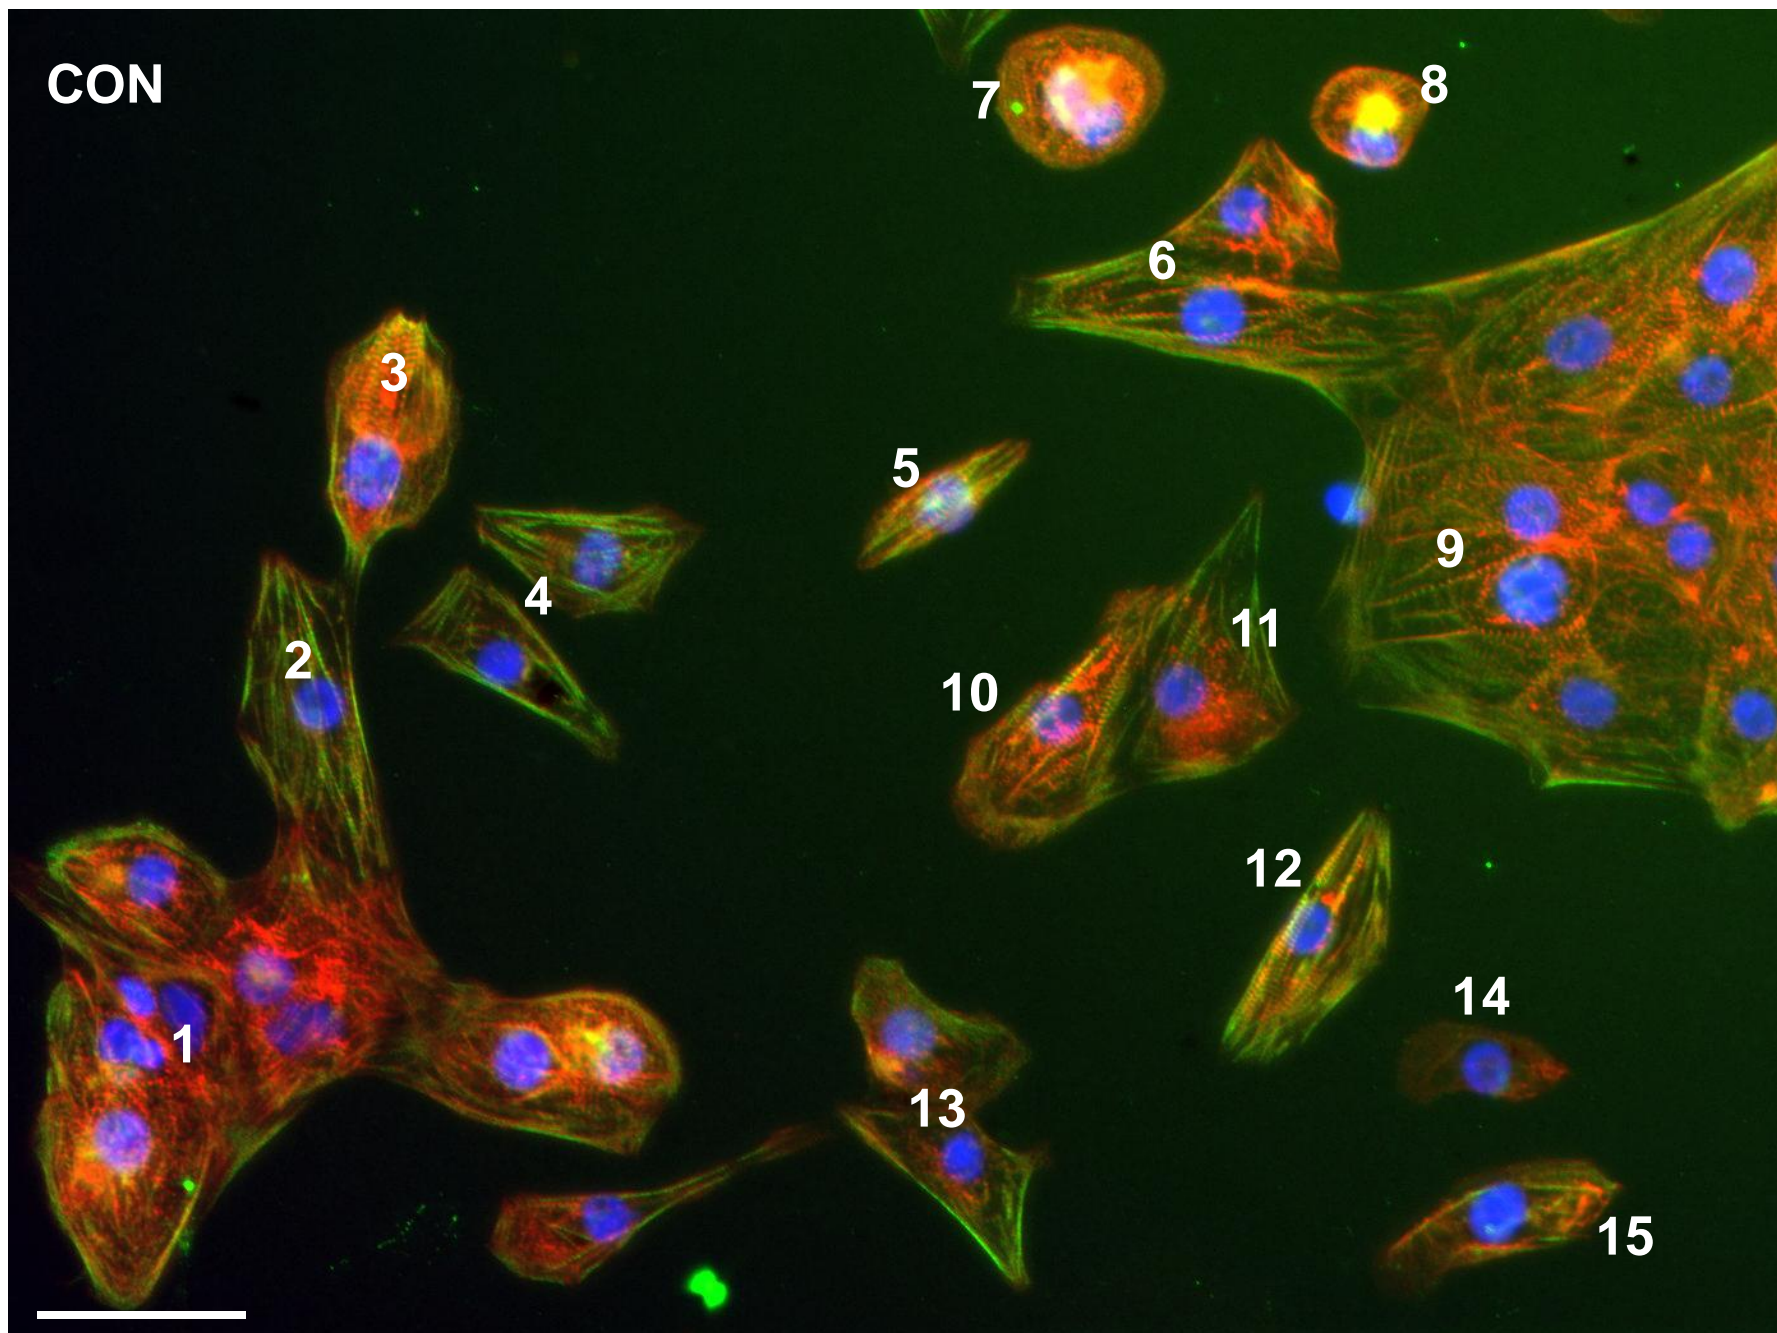

**Fig. S11B**

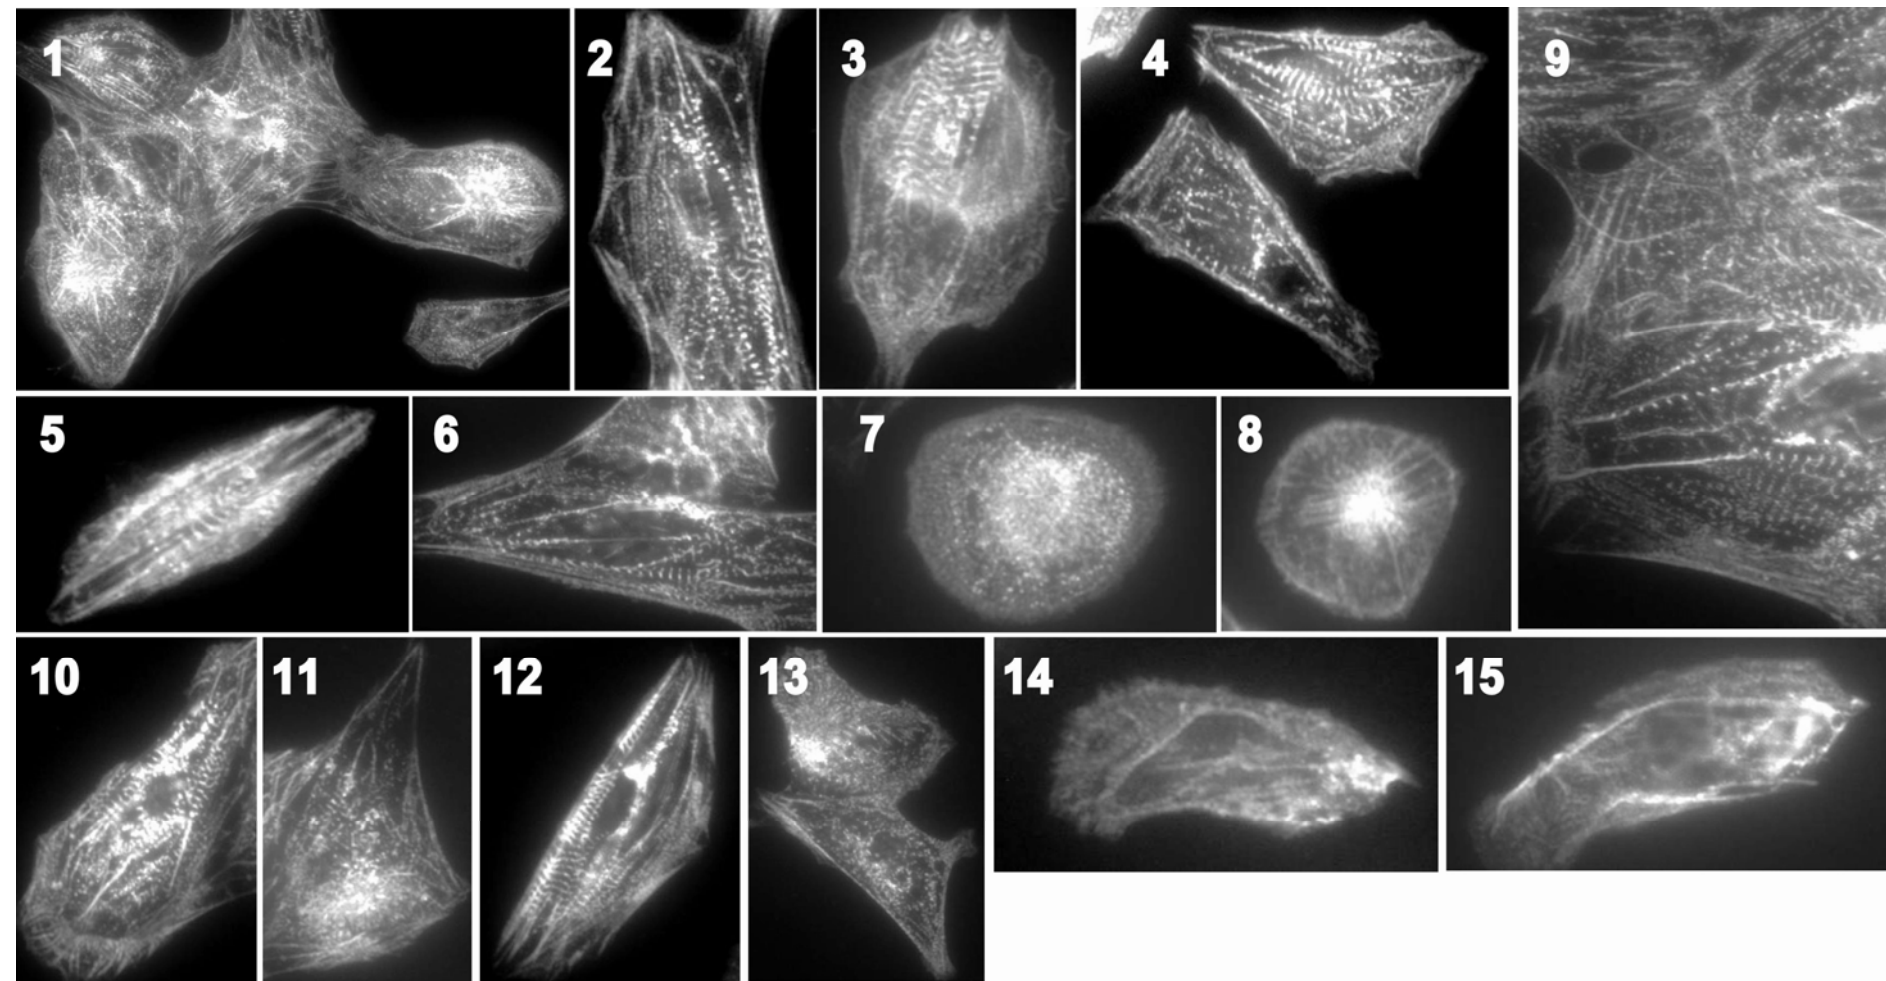

**Fig. S11C**

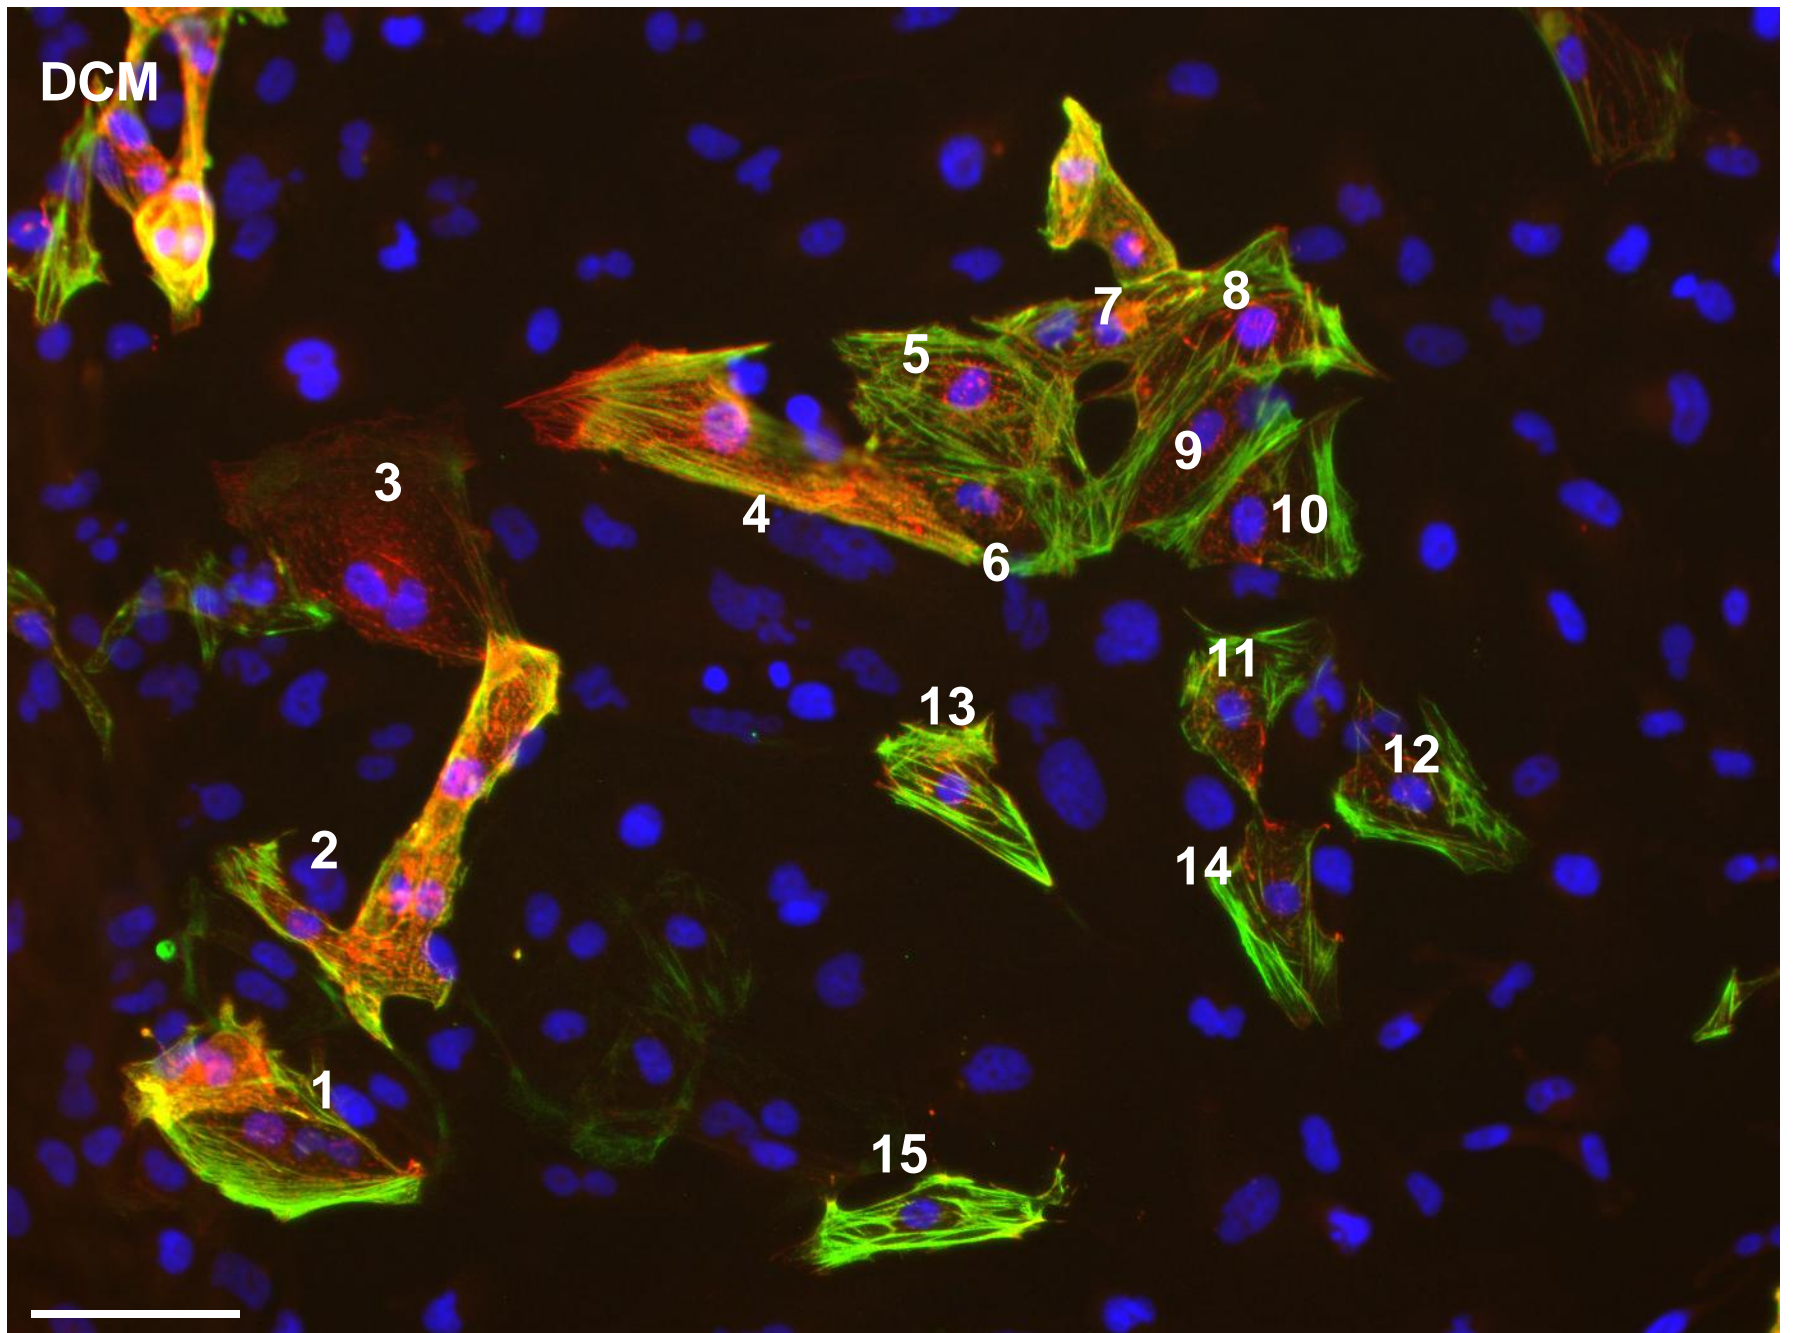

Fig. S11D

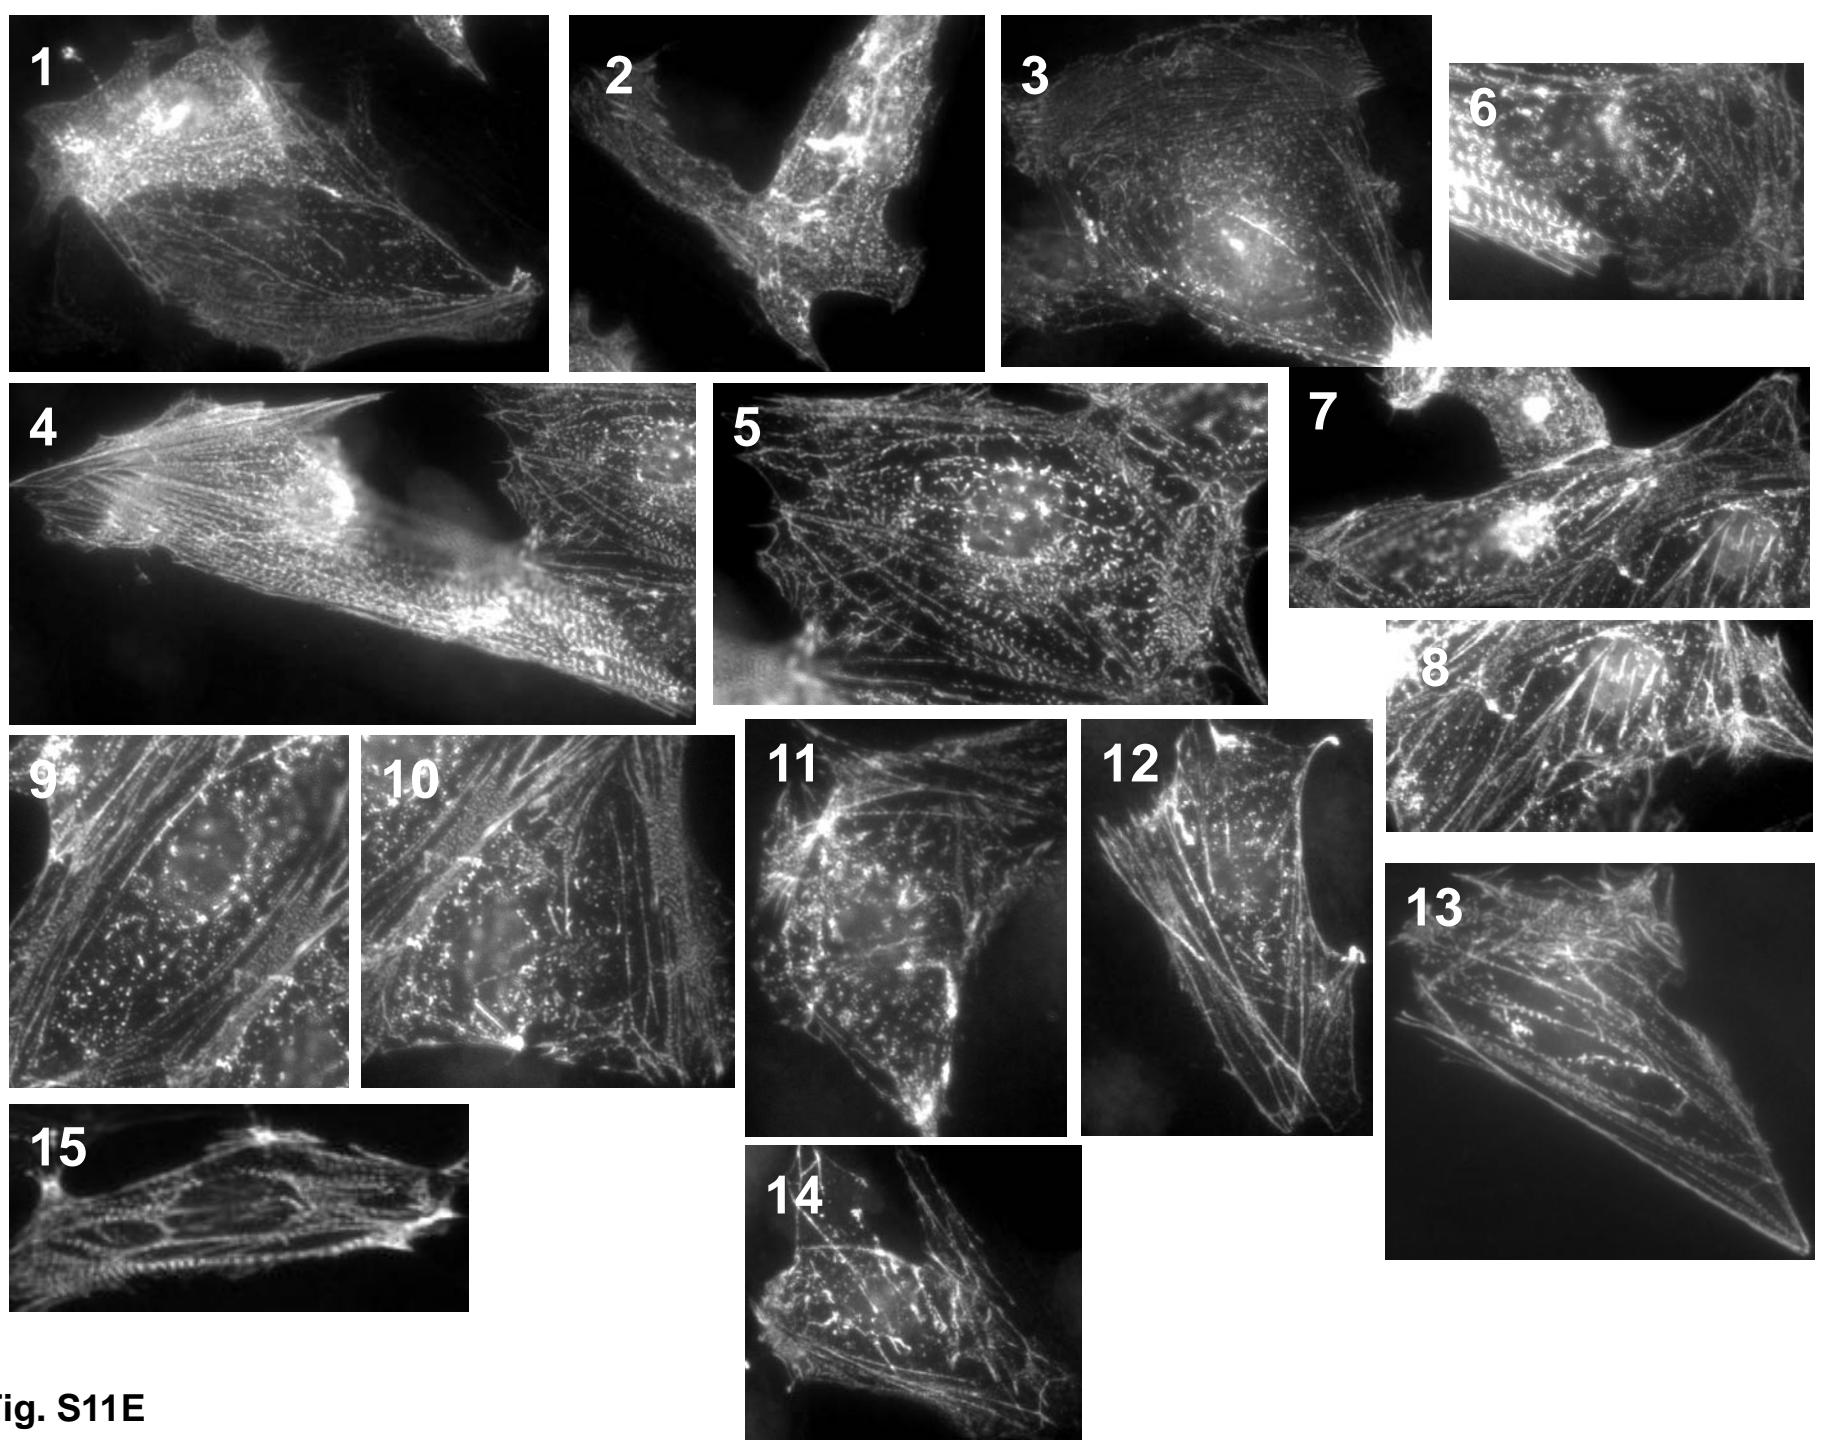

**Fig. S11E**

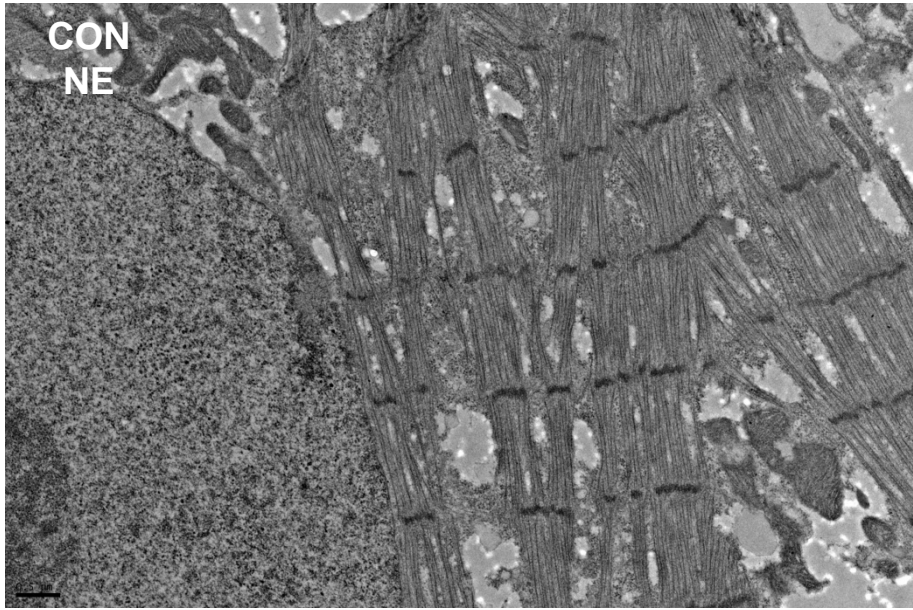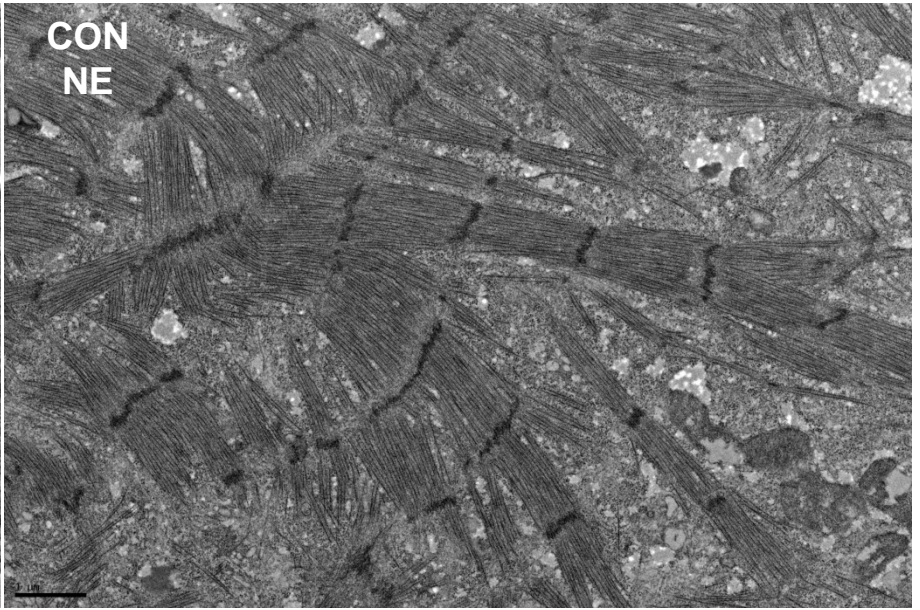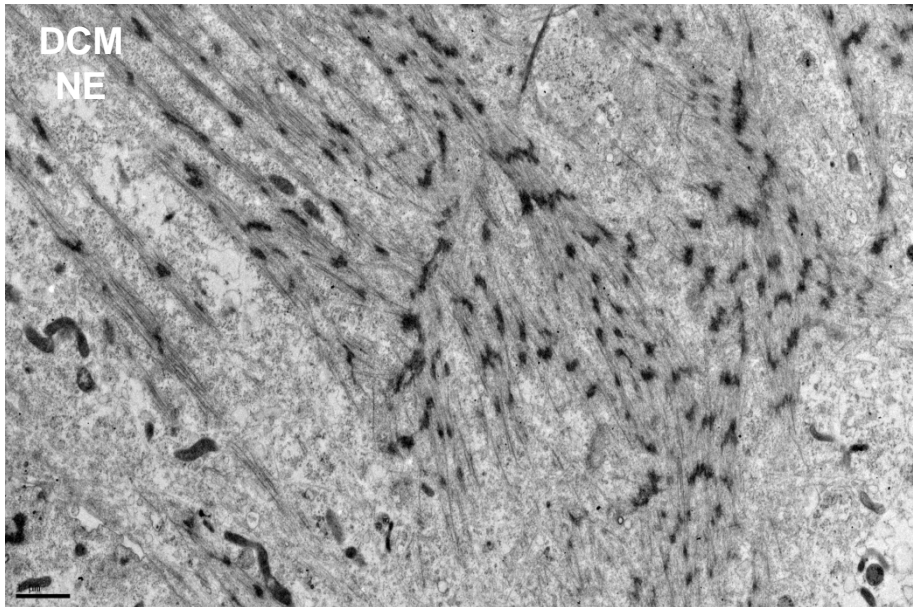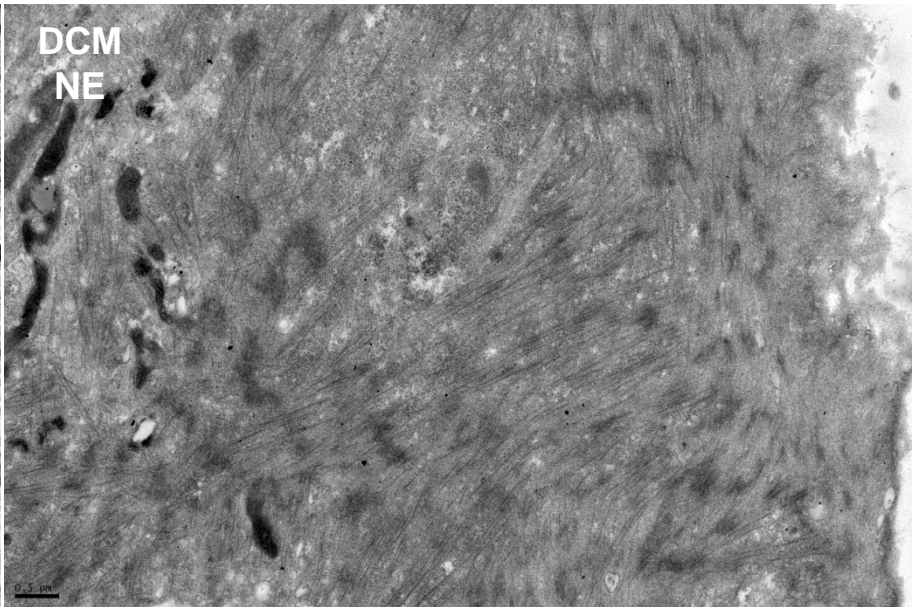

Fig. S11F

CON

No Stretch

$\alpha$ -actinin/cTnT/DAPI

Stretch

Single  
Cell

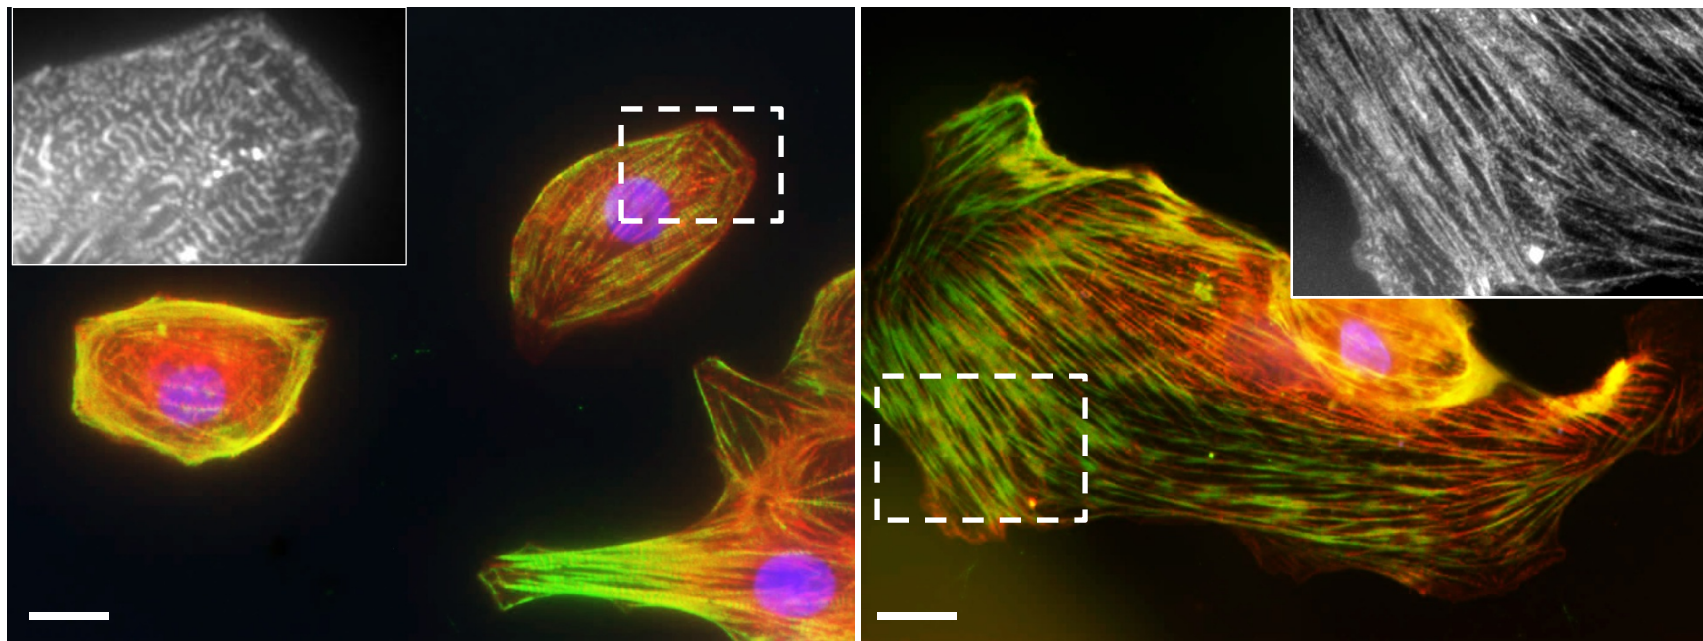

Cell  
Clump

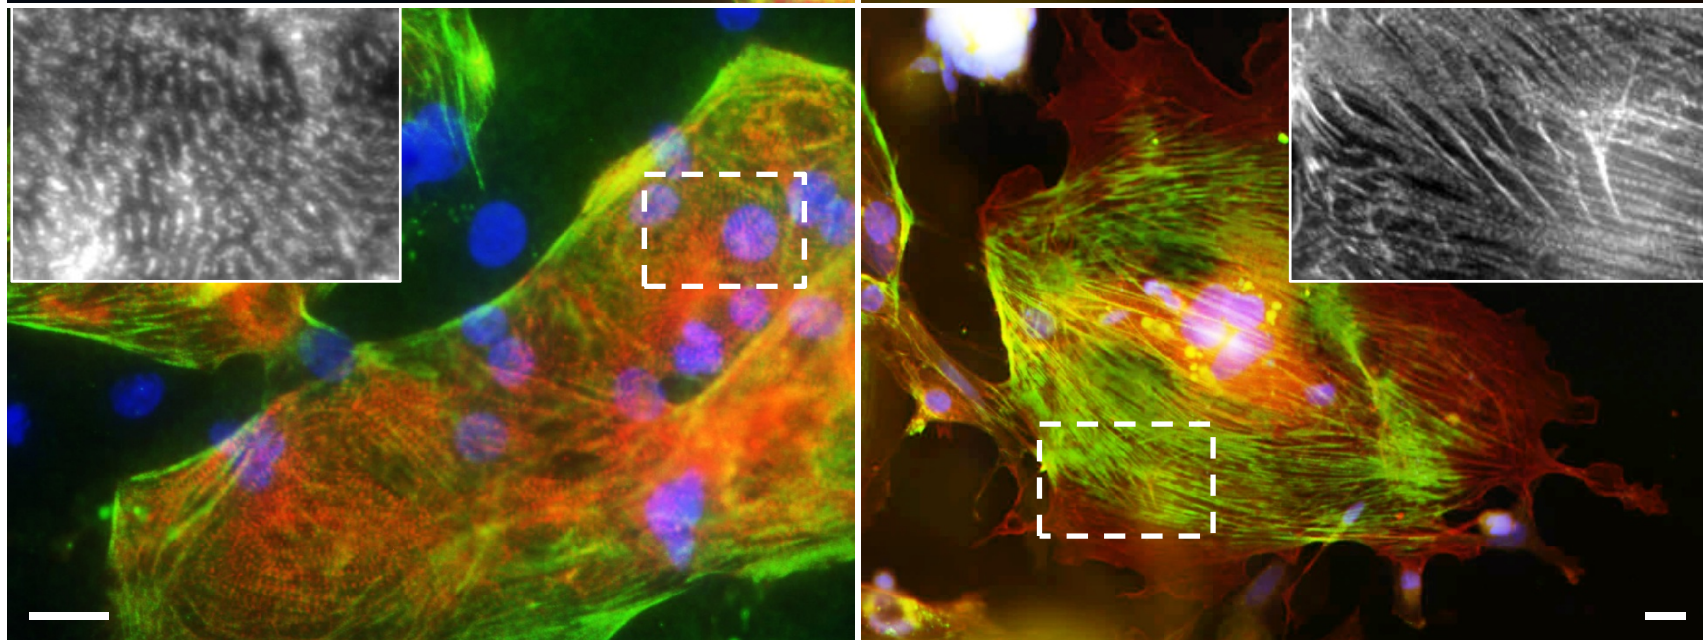

Fig. S12A



DCM                      No Stretch                       $\alpha$ -actinin/cTnT/DAPI                      Stretch

Single Cell

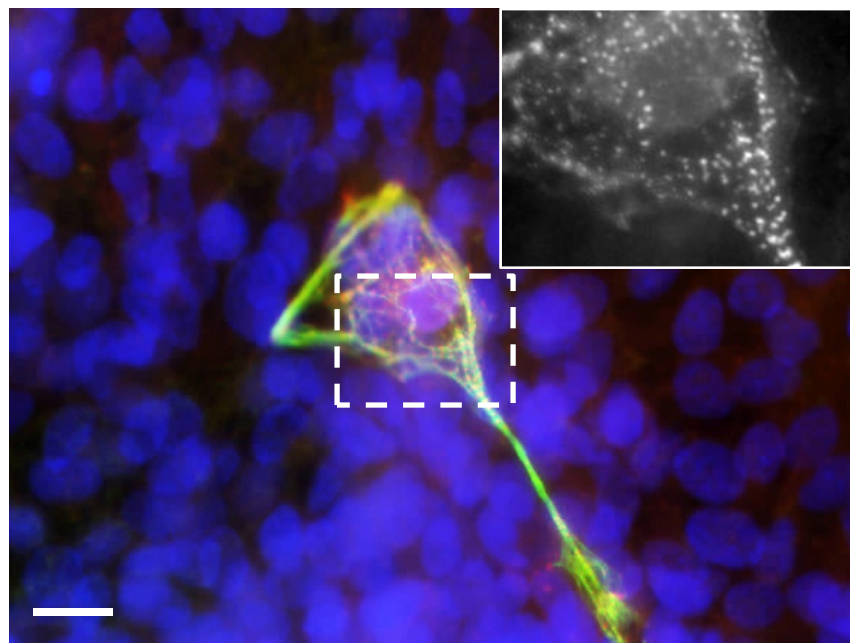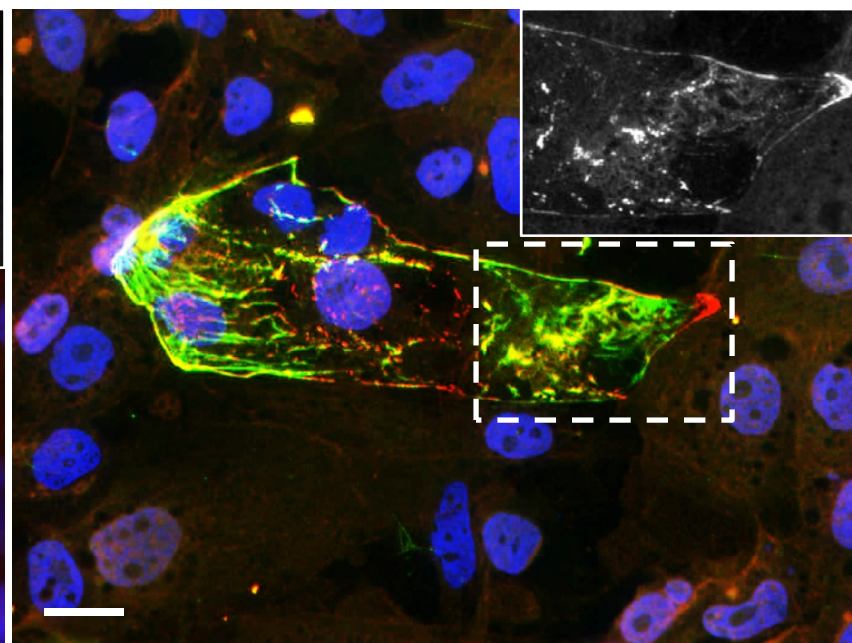

Cell Clump

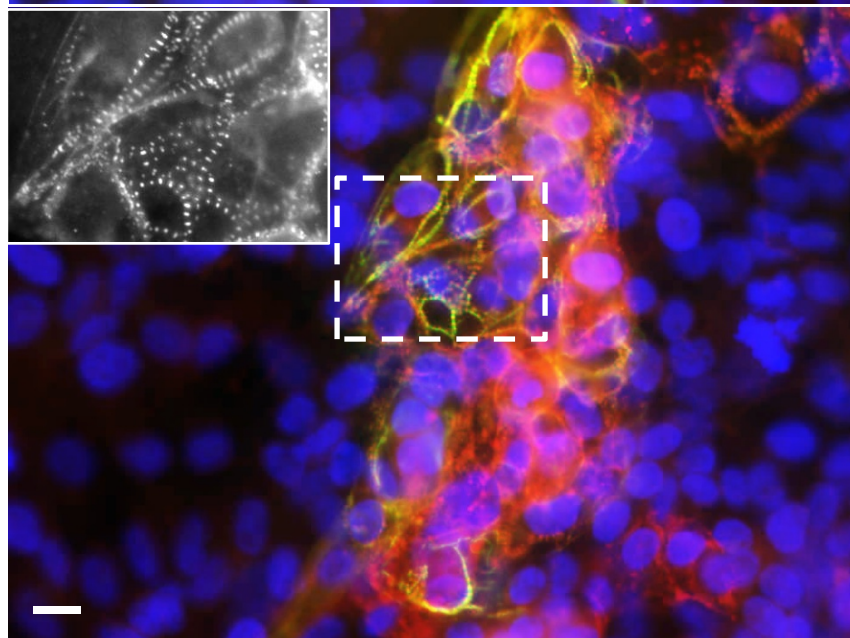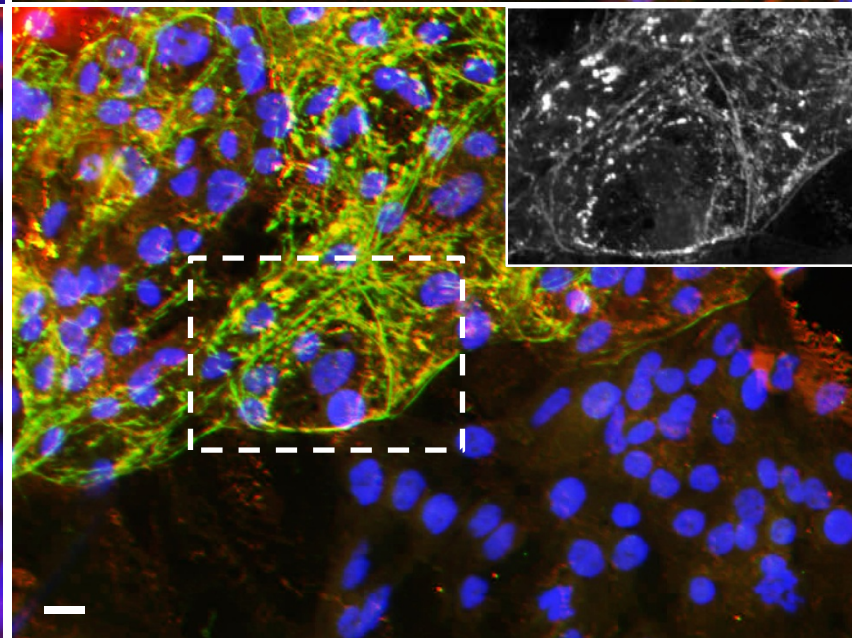

Fig. S12B

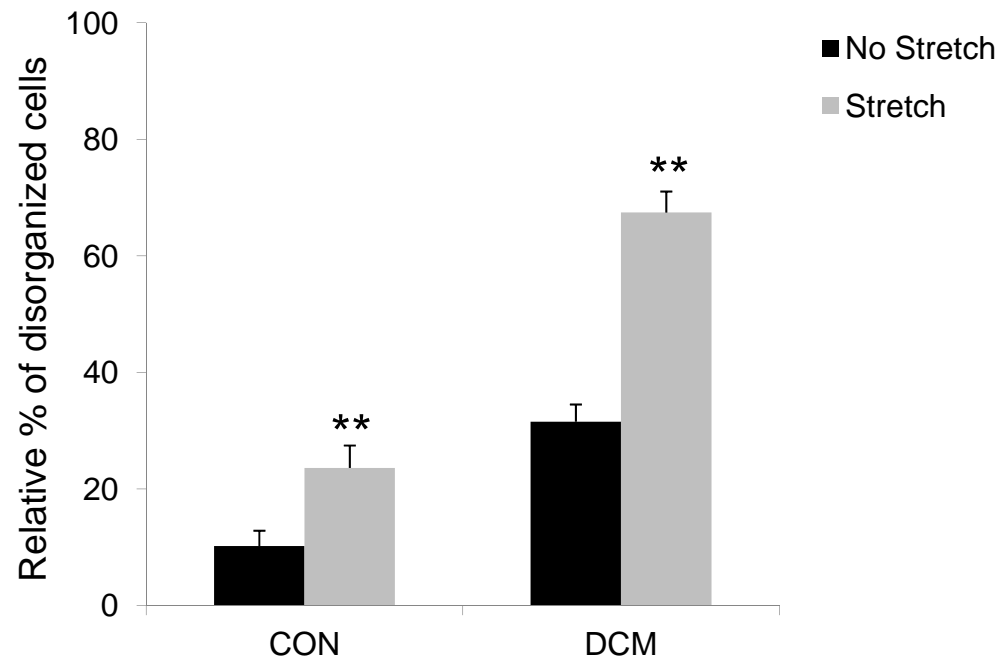

Fig. S12C

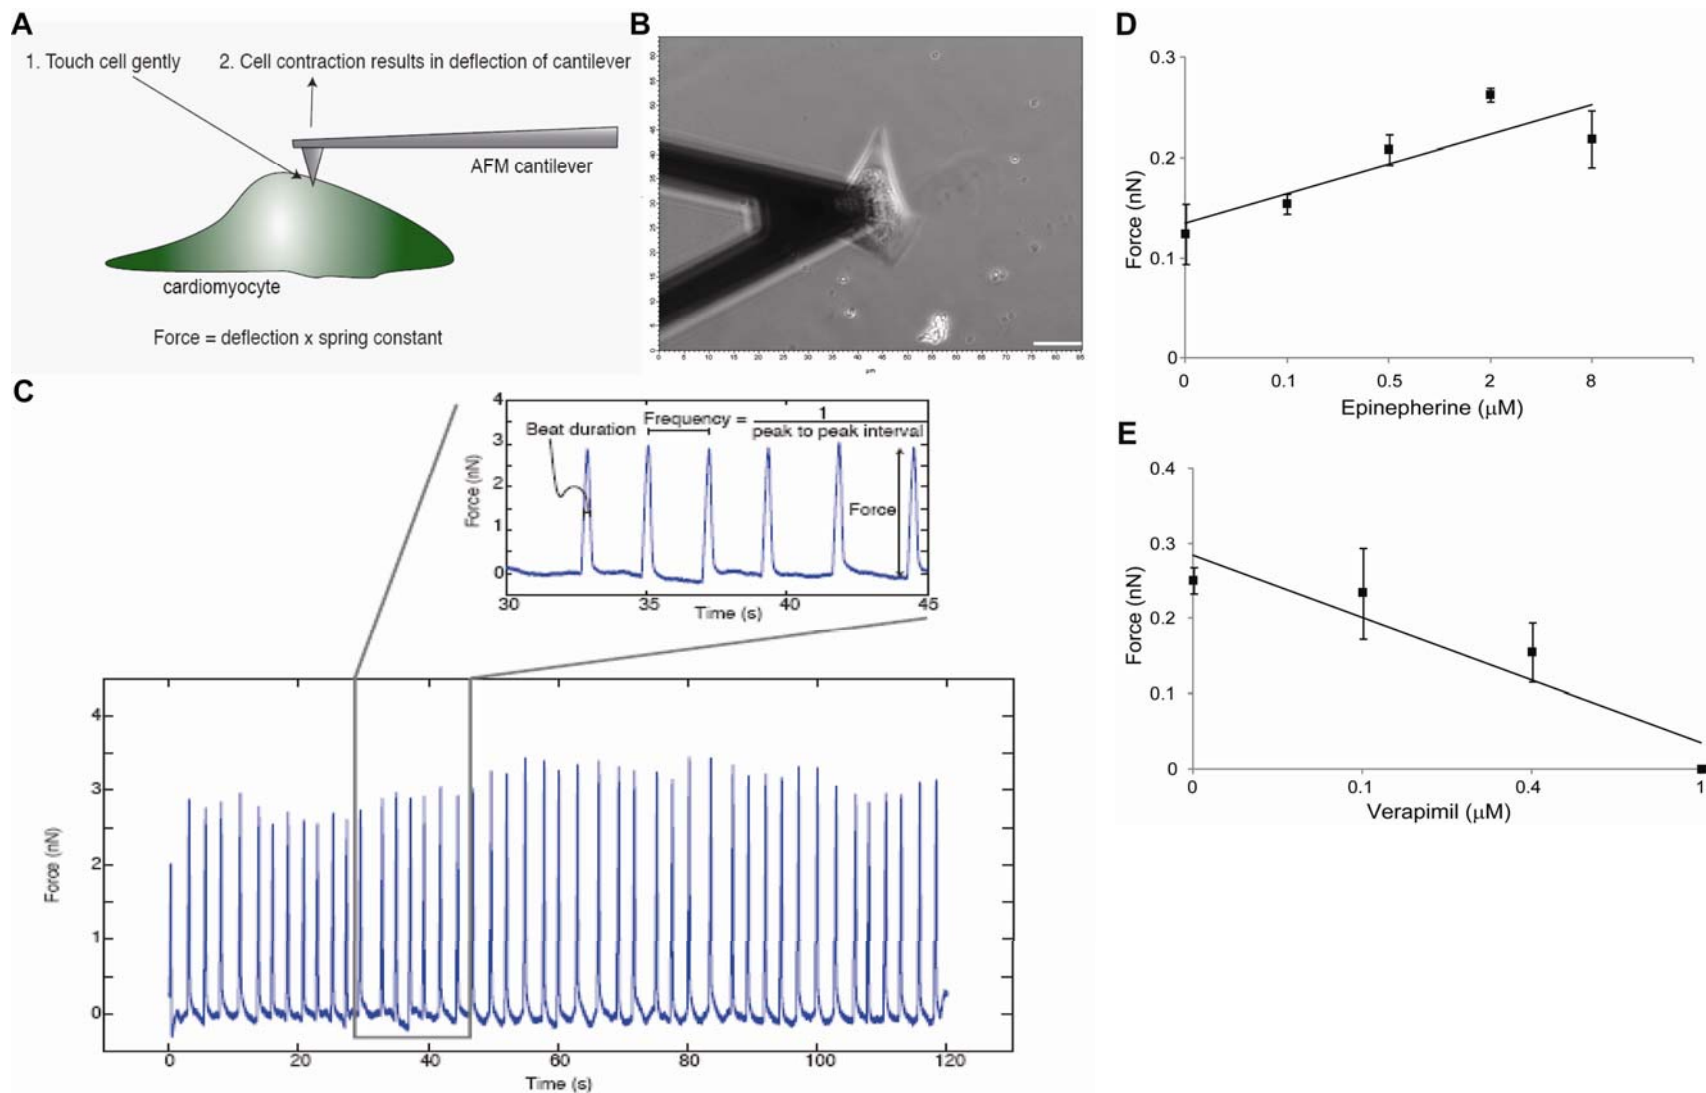

**Fig. S13**

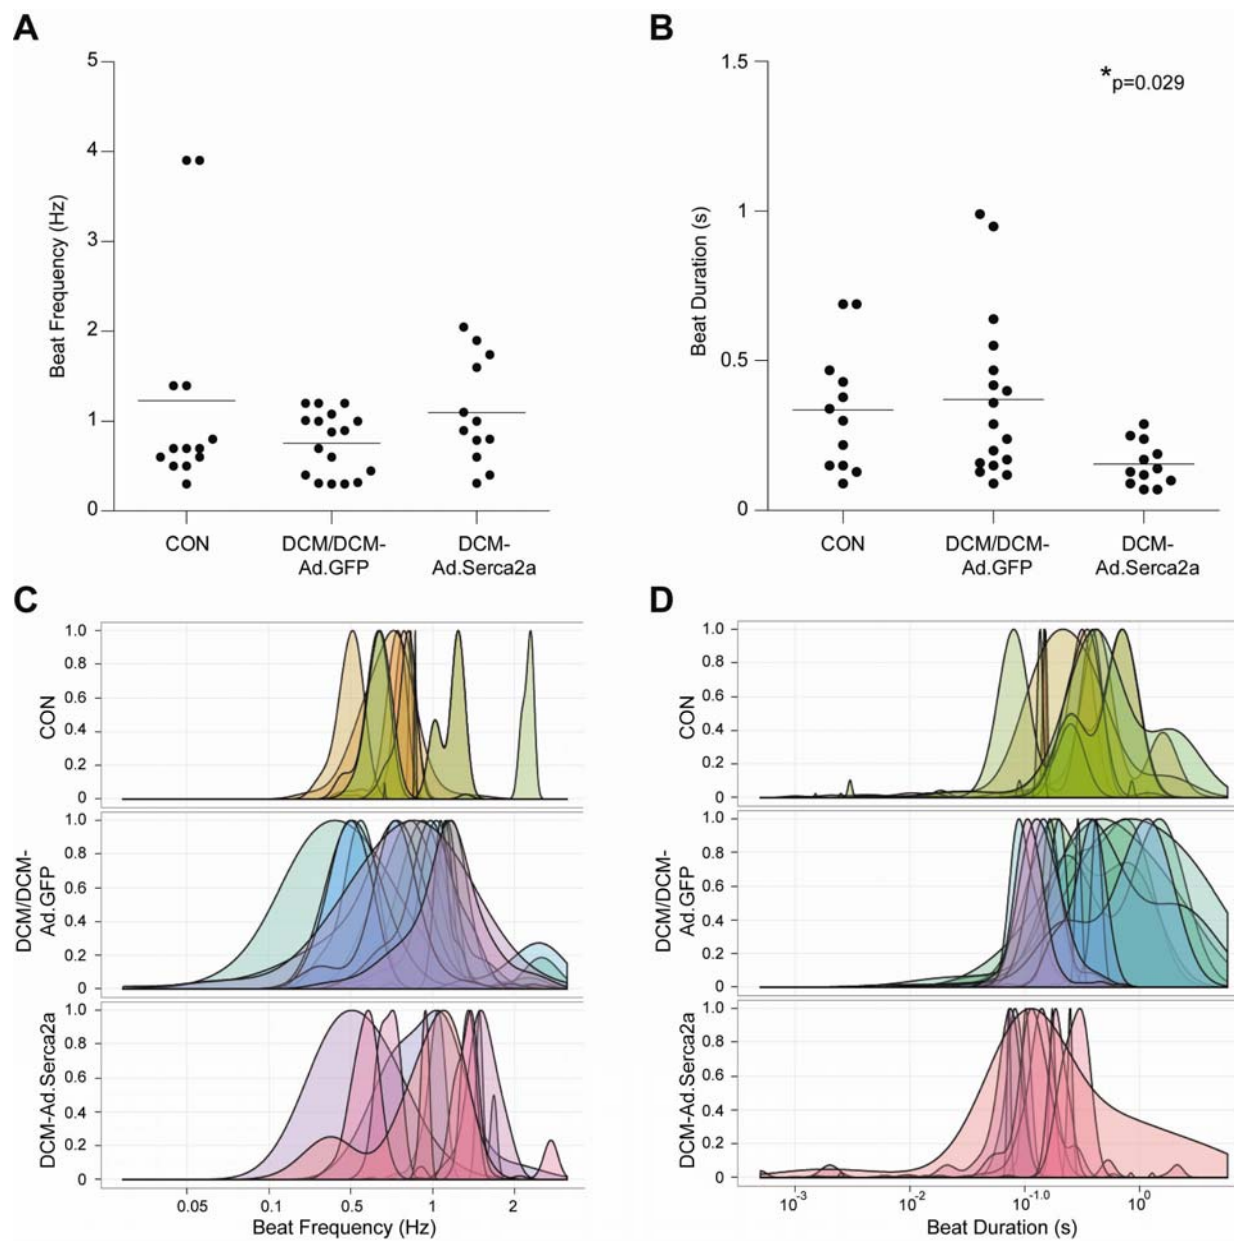

Fig. S14

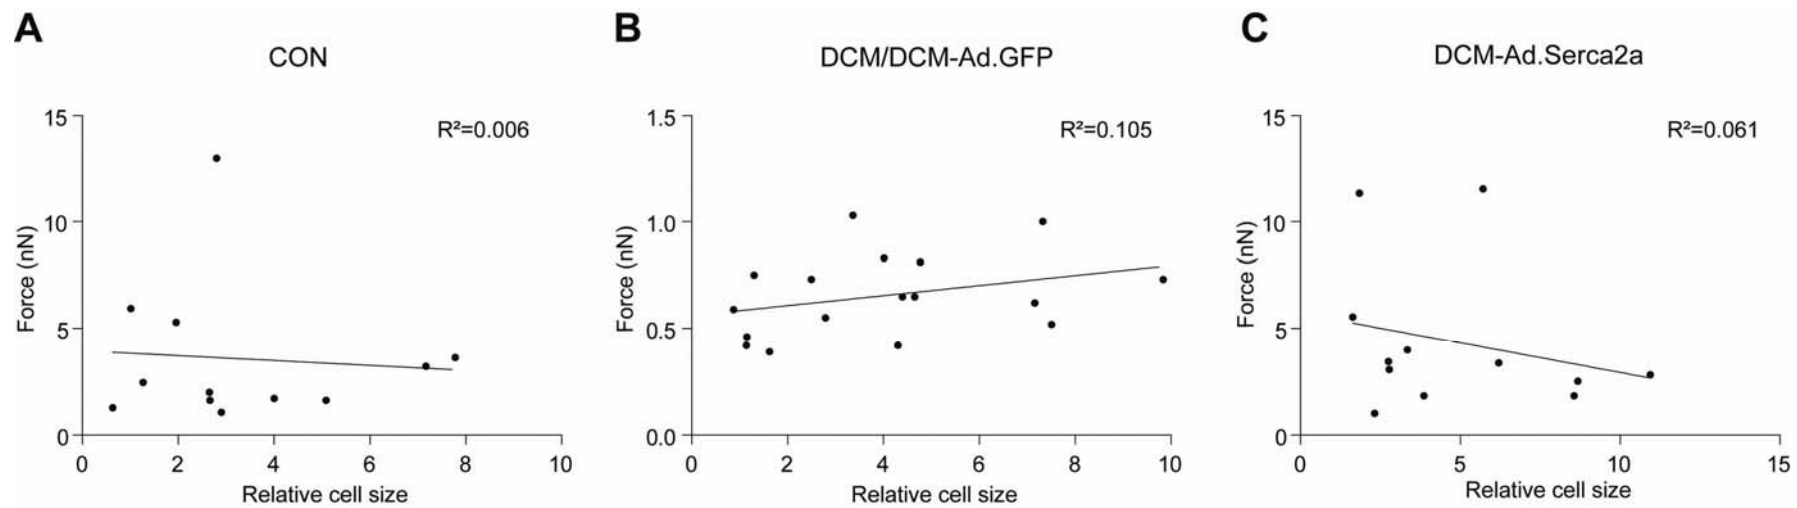

**Fig. S15**

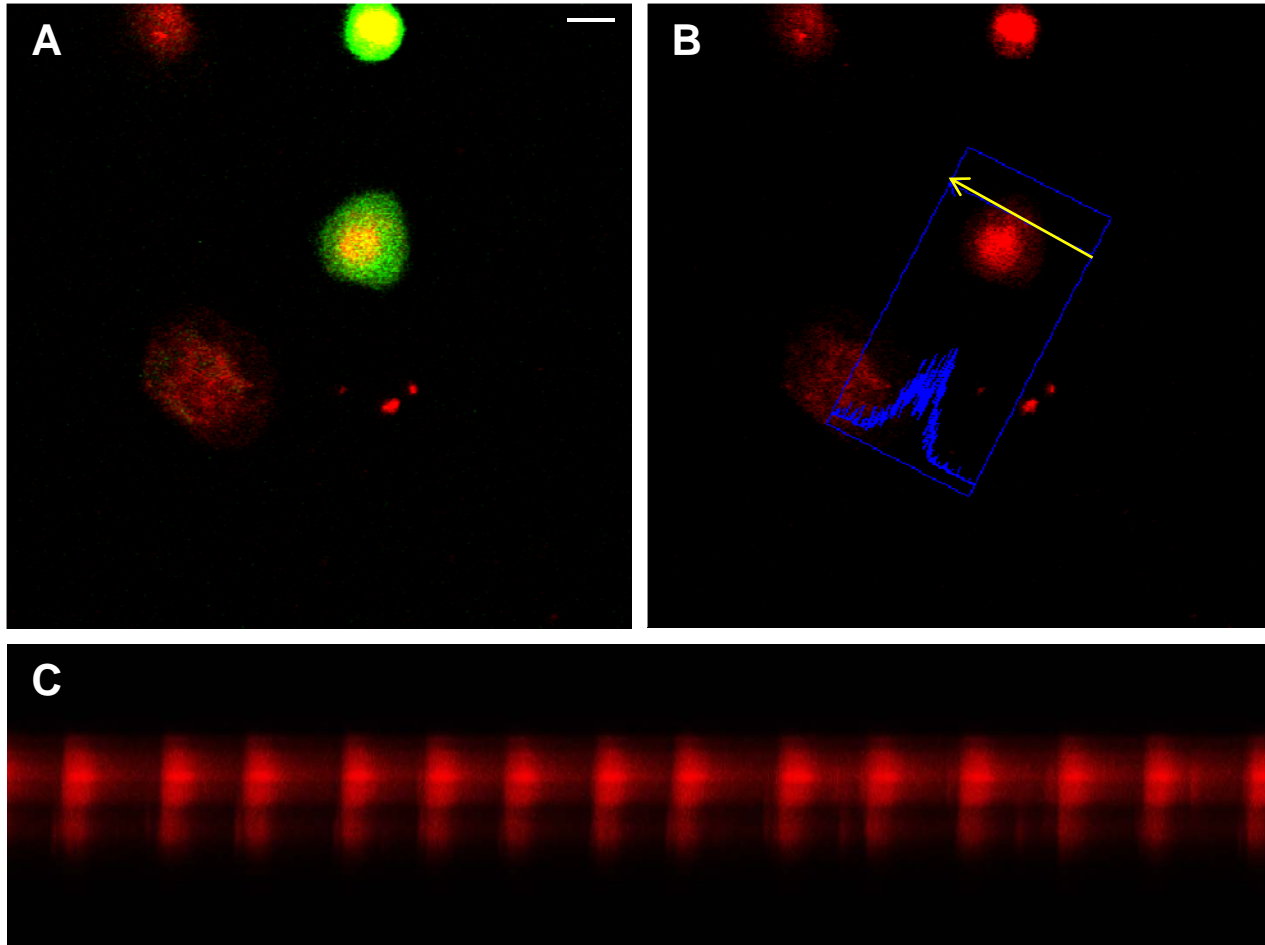

Fig. S16

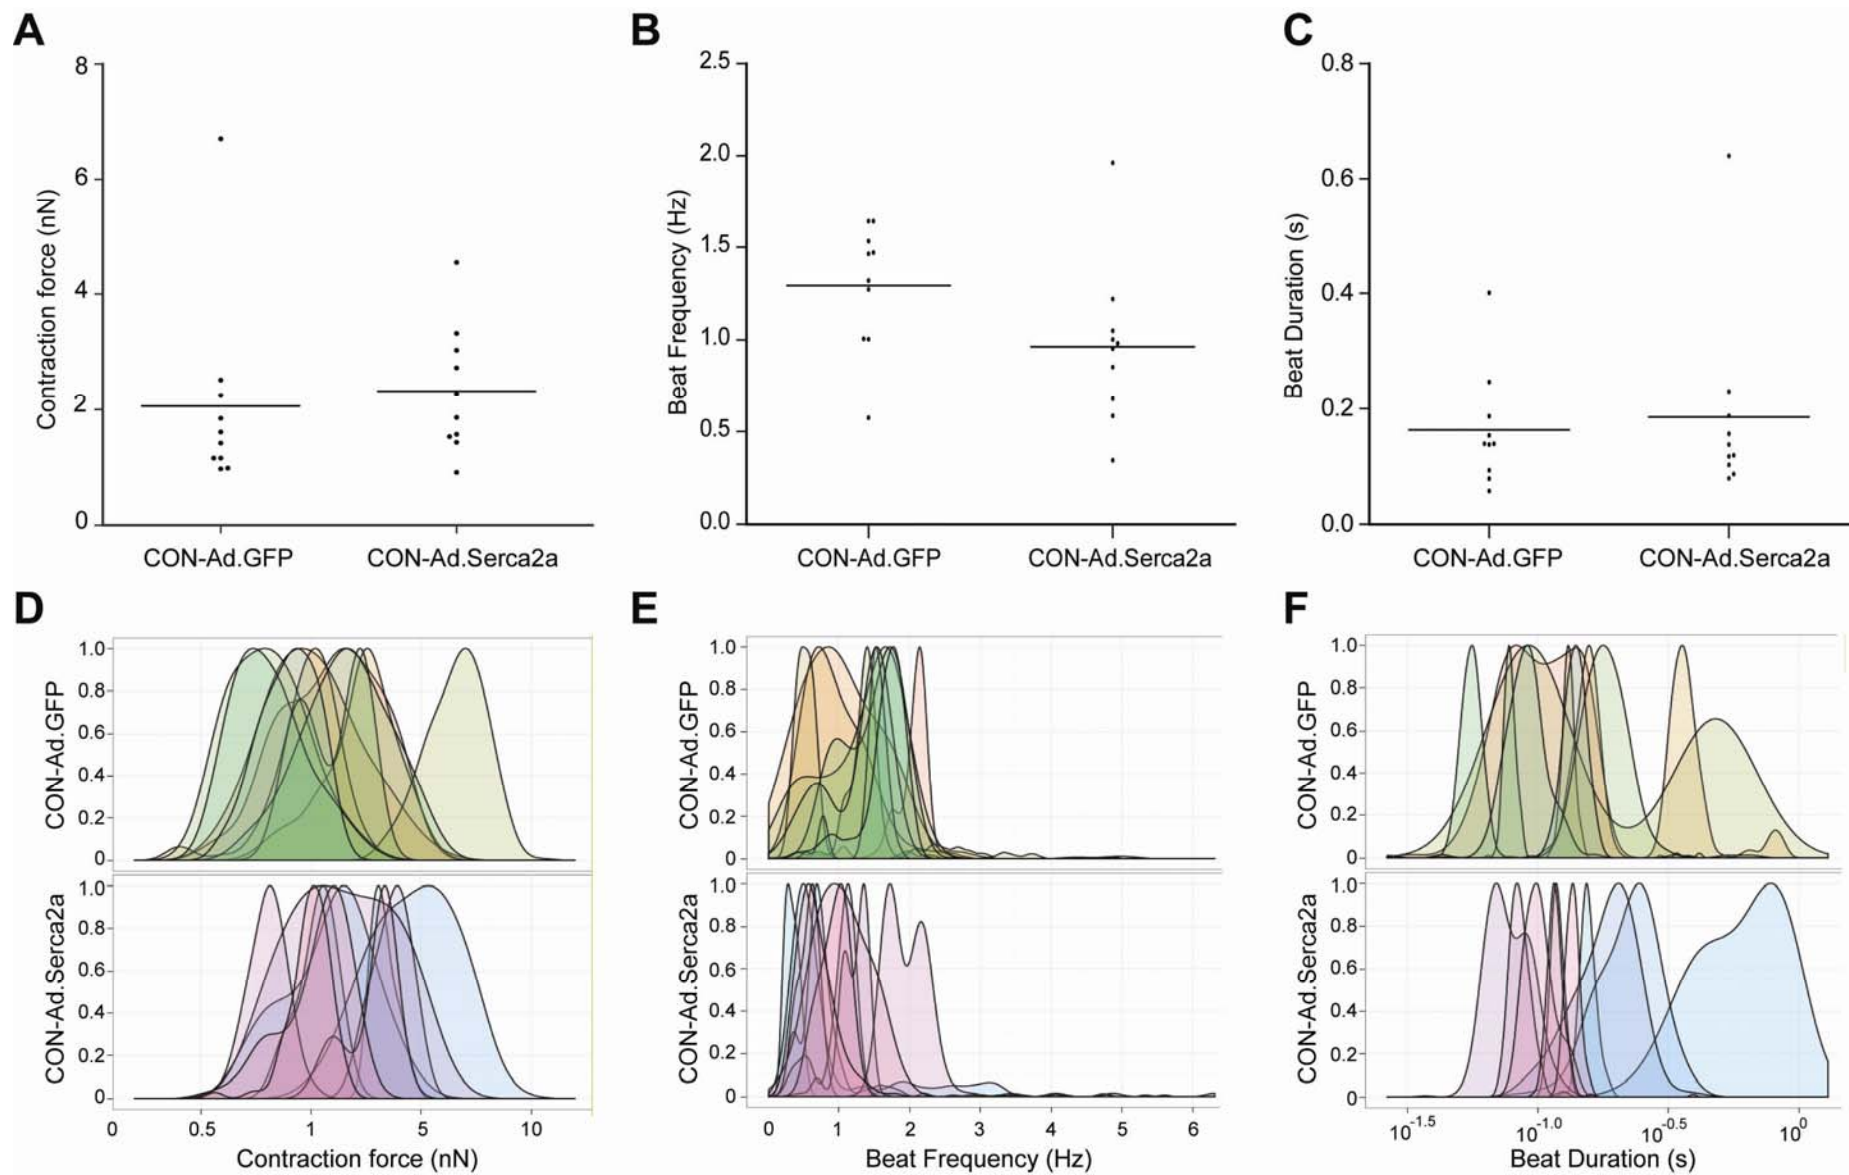

**Fig. S17**

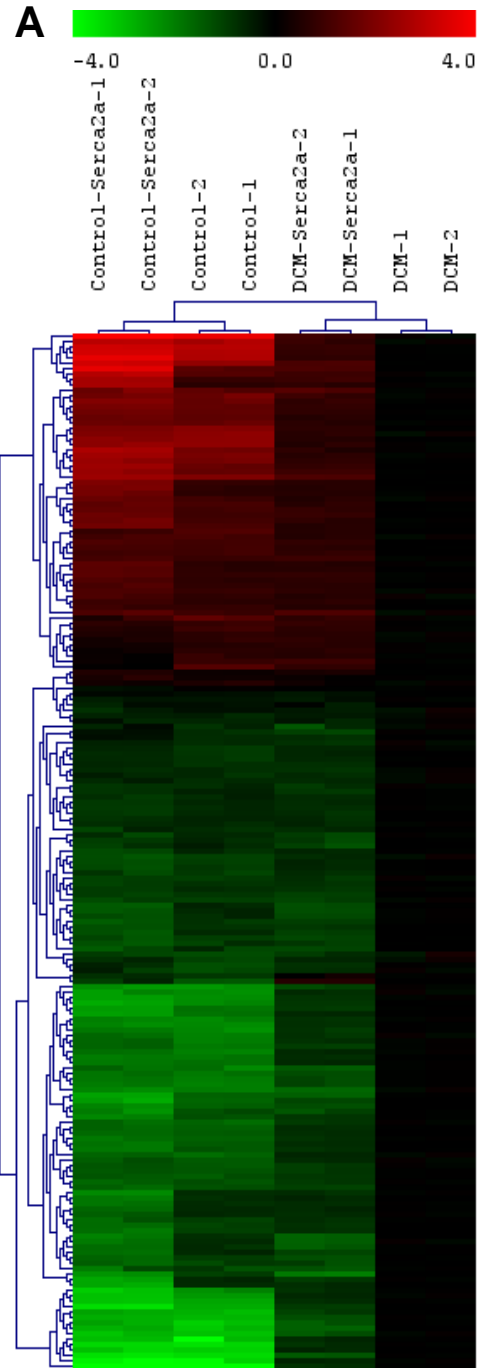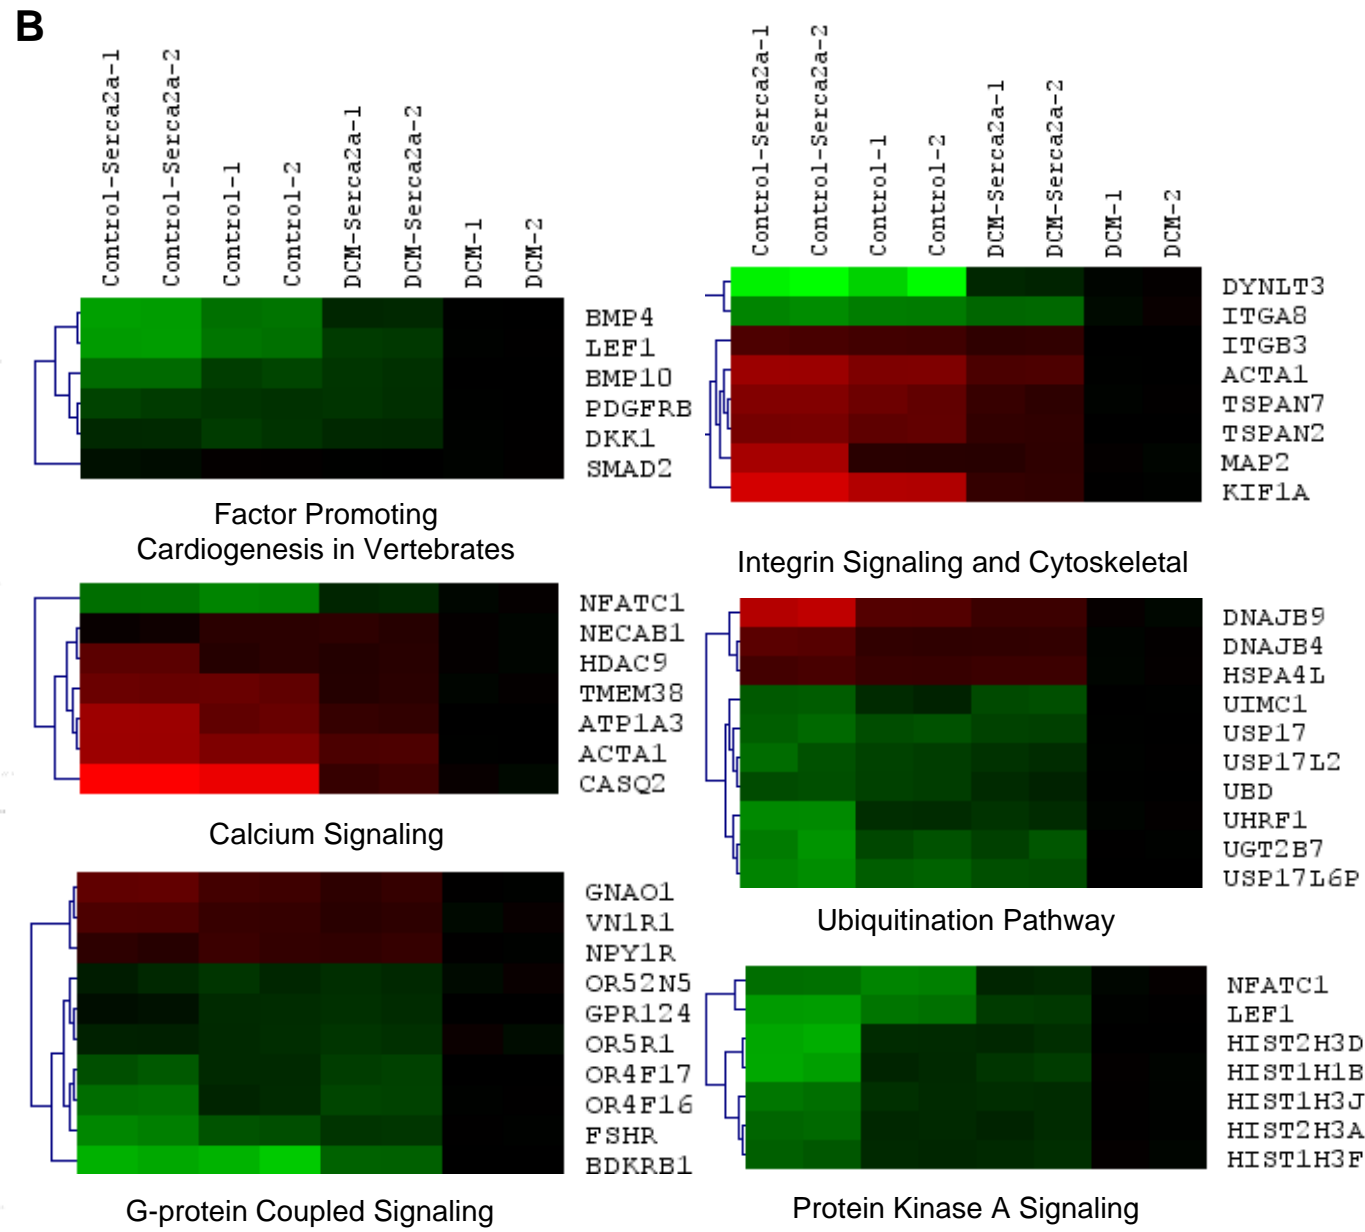

**Fig. S18**



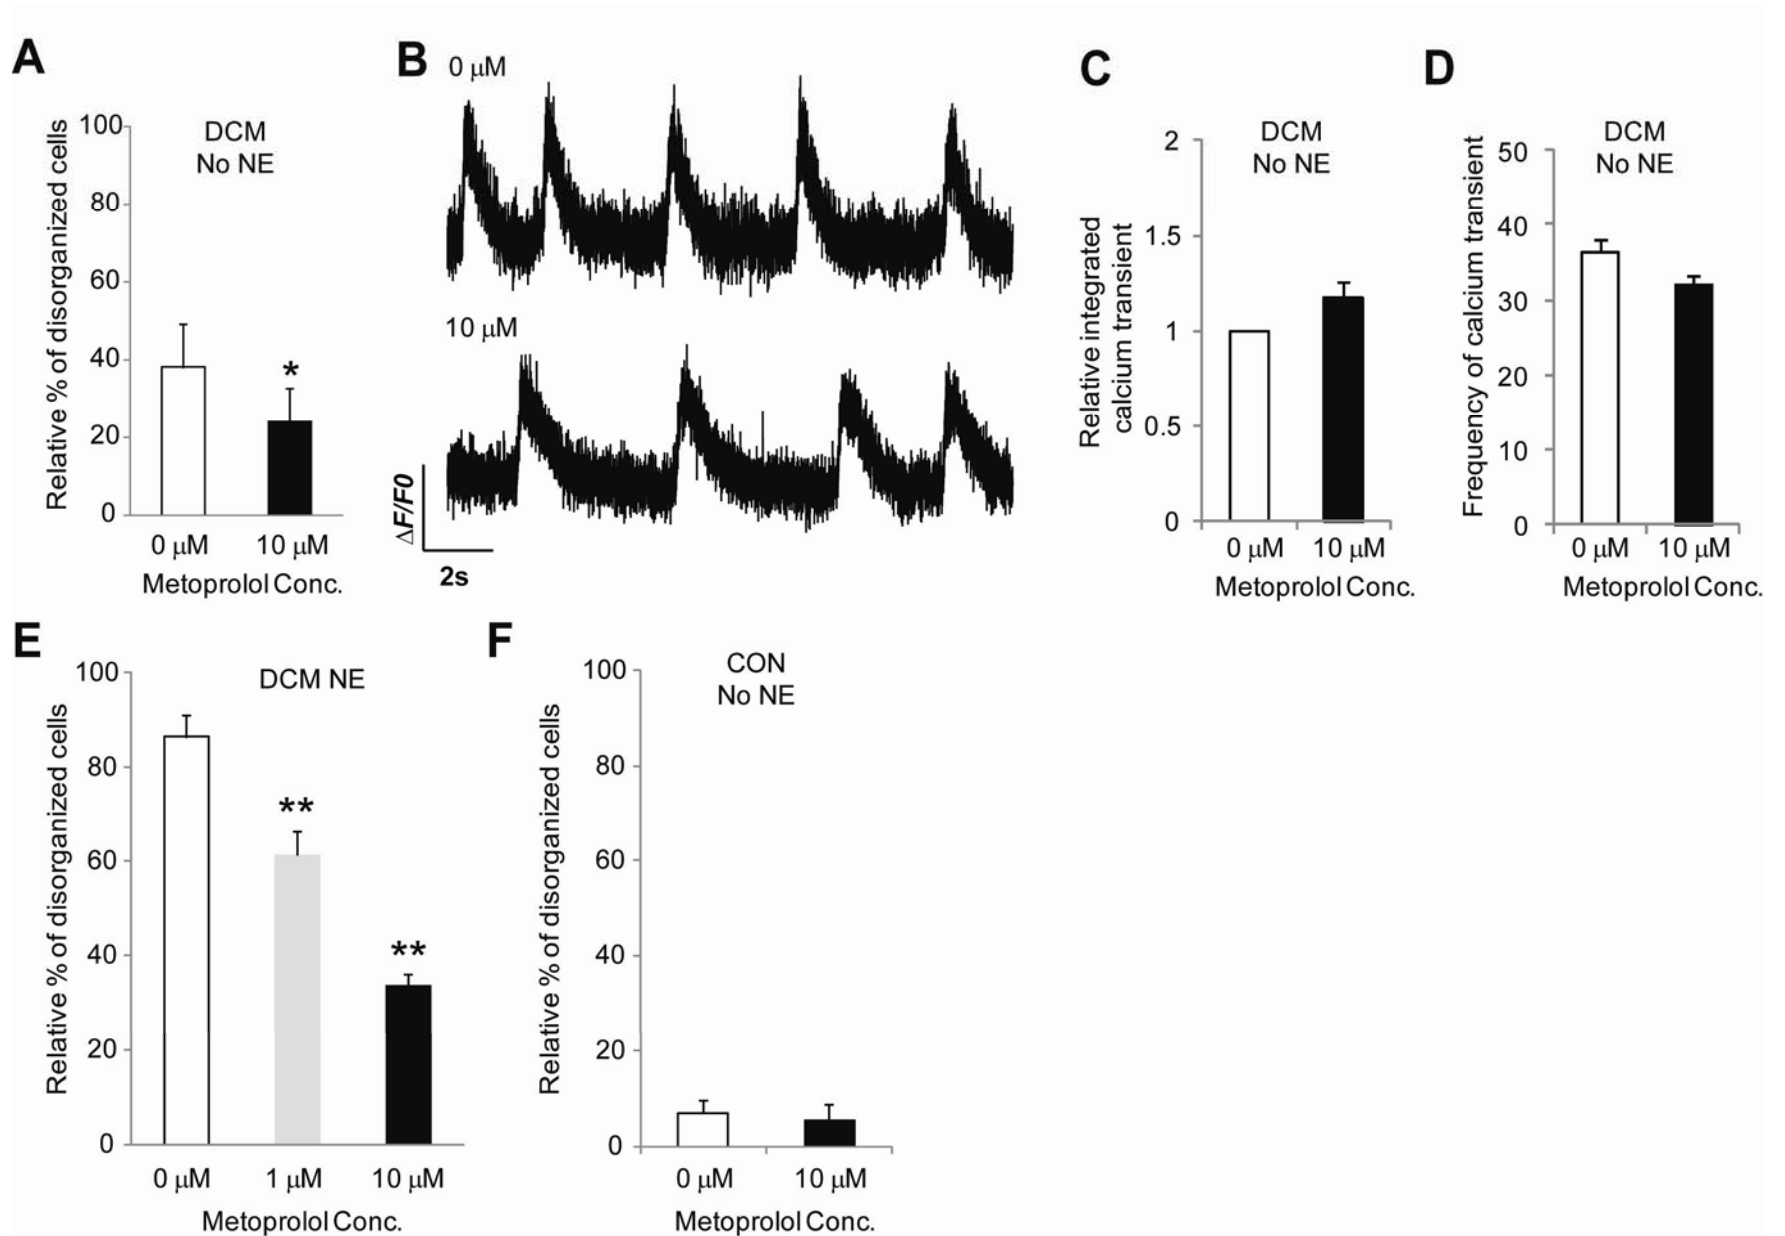

**Fig. S19**

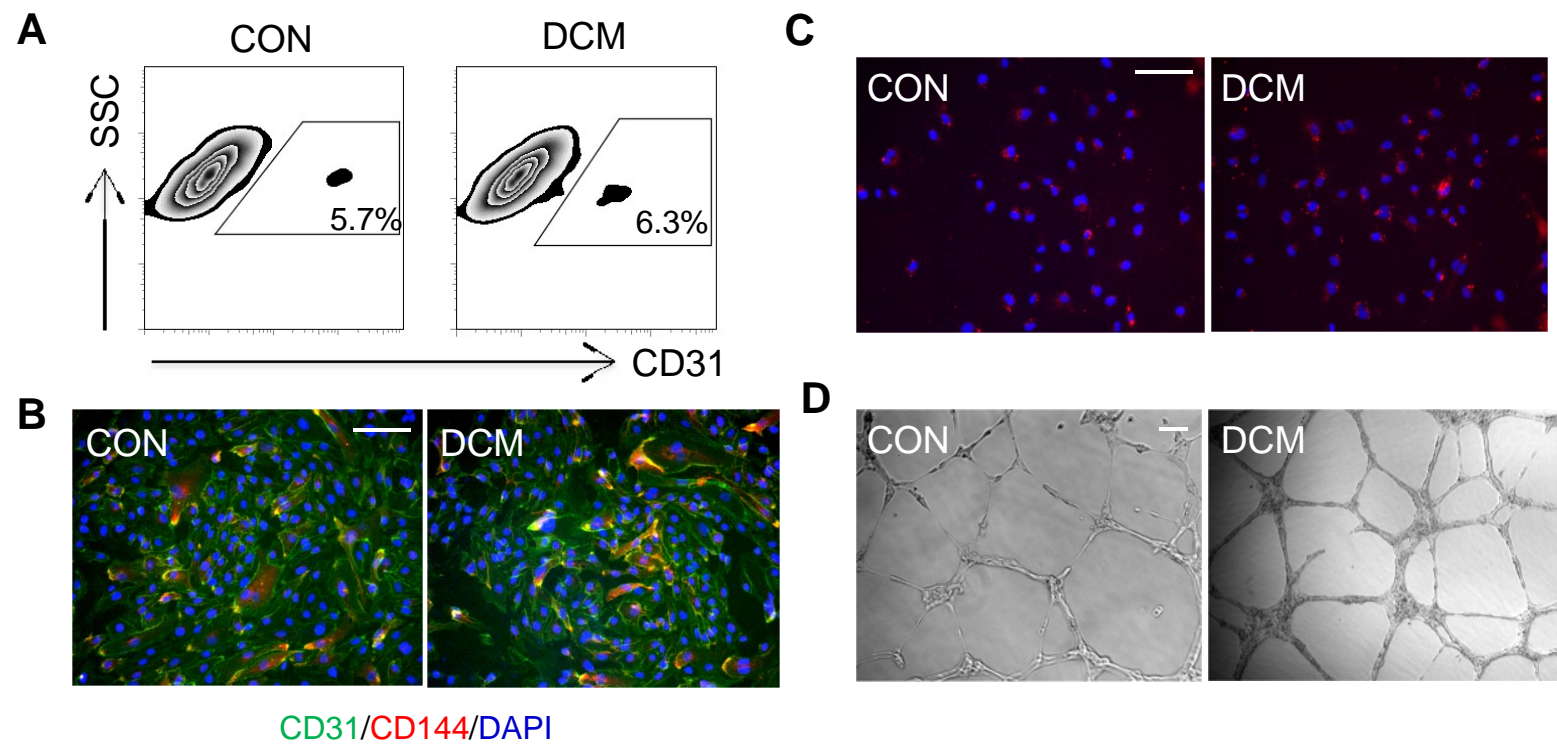

Fig. S20

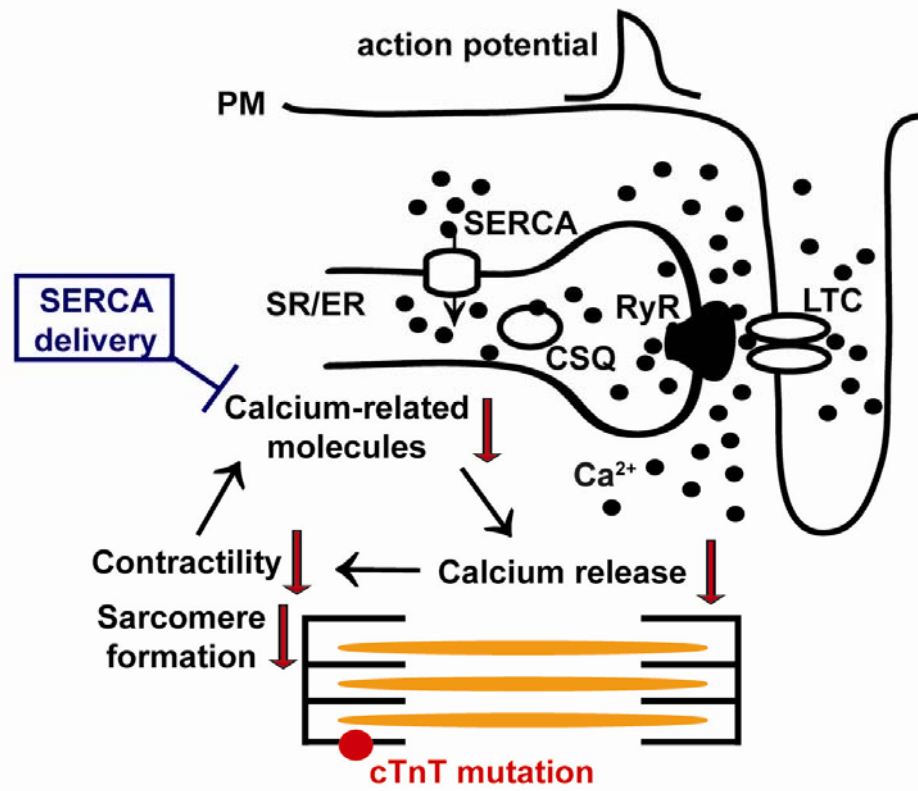

Fig. S21
